# Supplementary material for: Robust preferences for information that violates one’s self-perception: the case of non-human sources
Source: Research Square preprint supplement (doi:10.21203/rs.3.rs-7511591/v1), 2025-10-15
Supplement: Supplementary file 1 [file 085092ec045ffe72e9ea23c0.pdf]

# Supplementary 4 - Replication for Study 1

## Table of Contents

|          |                                                       |          |
|----------|-------------------------------------------------------|----------|
| <b>1</b> | <b>Background</b>                                     | <b>2</b> |
| <b>2</b> | <b>Participant Exclusion</b>                          | <b>2</b> |
| <b>3</b> | <b>Stimuli - Traits and Trait Questionnaires</b>      | <b>3</b> |
| <b>4</b> | <b>Analyses Unreported in the Paper</b>               | <b>4</b> |
| 4.1      | Main Model Analysis . . . . .                         | 4        |
| 4.2      | Comparing Replication Data to Original Data . . . . . | 6        |
| 4.3      | Anxiety Mediation . . . . .                           | 8        |
| 4.4      | Self-Esteem Mediation . . . . .                       | 11       |
| 4.5      | Trait Centrality Model . . . . .                      | 15       |

# 1 Background

This study is a replication of Study 1 as elaborated in the manuscript. This replication was conducted during the early months of the 'Haravot Habarzel' war in Gaza, under the hypothesis that heightened anxiety and adversity would increase motivation for self-verification and reduce tolerance for self-violations. The sole change is the removal of the Patient Health Question (PHQ-2) and the addition of 2 questionnaires-

- General Anxiety Disorder (GAD-7) questionnaire (Spitzer et al., 2006)
- a custom-designed questionnaire assessing both objective and subjective impacts of the war on participants. The questionnaire included questions such as:
  - I was evacuated from my house (objective)
  - Someone close to me was kidnapped (objective)
  - I felt that my life was in real danger (subjective)

# 2 Participant Exclusion

A total of N = 141 participants began the first session of Study 4.

92 participants did not finish the study and were excluded from data analysis according to pre-registered criteria:

- Twenty-four provided in session 1 self-ratings that were unsuitable for session 2. Elaborated below.
- Thirty-nine failed comprehension checks either at the beginning of Session 1 or at the beginning of Session 2.
- Nineteen failed attention checks either on Session 1 or on Session 2.
- Five did not finish Session 1.
- Two did not return to session 2 in the appropriate time.
- Three participants completed the study on a tablet rather than a computer as instructed.

The final analysis included  $N = 49$  participants. Note that this large dropout was expected as the study was conducted during an ongoing war on students who study in Beer-Sheva, the largest city in southern Israel, not very far from the war front.

#### Unsuitable self-ratings-

To be eligible for the 2nd session, participants needed to provide self-rating that allow us to create feedbacks for all 4 conditions-

- Positive Verification - a feedback similar to the self-rating ( $\text{self-rating} + \text{rand}(-5:5)$ ) of a trait self-rated higher than 75.
- Positive Violation - a feedback higher than the self-rating ( $\text{self-rating} + 30 + \text{rand}(-5:5)$ ).
- Non-Positive Verification - a feedback similar to the self-rating ( $\text{self-rating} + \text{rand}(-5:5)$ ) of a trait self-rated between 35-65.
- Negative Violation - a feedback lower than the self-rating ( $\text{self-rating} - 30 + \text{rand}(-5:5)$ ).

To do so, an eligible participant needed to have:

- at least 4 traits self-rated higher than 75 &
- at least 4 (different) traits self-rated lower than 70 &
- at least 4 (different) traits self-rated between 35 and 65 &
- at least 4 (different) traits self-rated higher than 30

### **3 Stimuli - Traits and Trait Questionnaires**

Stimuli were exactly the same as in Study 1, see Supplementary 1 - Study 1.

## 4 Analyses Unreported in the Paper

### 4.1 Main Model Analysis

The model predicting the desire to retake questionnaire is a 2X2 design:

- Feedback: Verifying feedback vs. Violating feedback
- Valence: Positive feedback vs. Non-positive feedback

Table 1: Fixed Effects from Main Model

| term                      | $\beta$ | SE    | t value | df     | p.value | CI Lower | CI Upper |
|---------------------------|---------|-------|---------|--------|---------|----------|----------|
| Intercept                 | -1.291  | 4.102 | -0.315  | 49.315 | 0.754   | -9.534   | 6.951    |
| Feedback                  | 19.211  | 2.982 | 6.442   | 47.826 | 0.000   | 13.214   | 25.207   |
| Valence                   | 5.354   | 1.414 | 3.788   | 51.756 | 0.000   | 2.518    | 8.191    |
| Feedback $\times$ Valence | 2.119   | 1.568 | 1.351   | 30.384 | 0.187   | -1.082   | 5.320    |

Table 2: Estimated Marginal Means: Feedback  $\times$  Valence

| feedback     | valence      | emmean  | SE    | df     | lower.CL | upper.CL |
|--------------|--------------|---------|-------|--------|----------|----------|
| Violation    | Non-Positive | 25.393  | 6.313 | 48.685 | 12.705   | 38.080   |
| Verification | Non-Positive | -17.267 | 5.587 | 45.436 | -28.516  | -6.018   |
| Violation    | Positive     | 10.446  | 4.688 | 42.257 | 0.988    | 19.905   |
| Verification | Positive     | -23.738 | 5.441 | 44.802 | -34.698  | -12.777  |

Table 3: Estimated Marginal Means: Feedback

| feedback     | emmean  | SE    | df     | lower.CL | upper.CL |
|--------------|---------|-------|--------|----------|----------|
| Violation    | 17.920  | 4.986 | 48.671 | 7.899    | 27.941   |
| Verification | -20.502 | 5.203 | 48.107 | -30.964  | -10.041  |

Table 4: Estimated Marginal Means: Valence

| valence      | emmean | SE    | df     | lower.CL | upper.CL |
|--------------|--------|-------|--------|----------|----------|
| Non-Positive | 4.063  | 4.618 | 47.853 | -5.223   | 13.350   |
| Positive     | -6.646 | 4.101 | 47.196 | -14.895  | 1.603    |

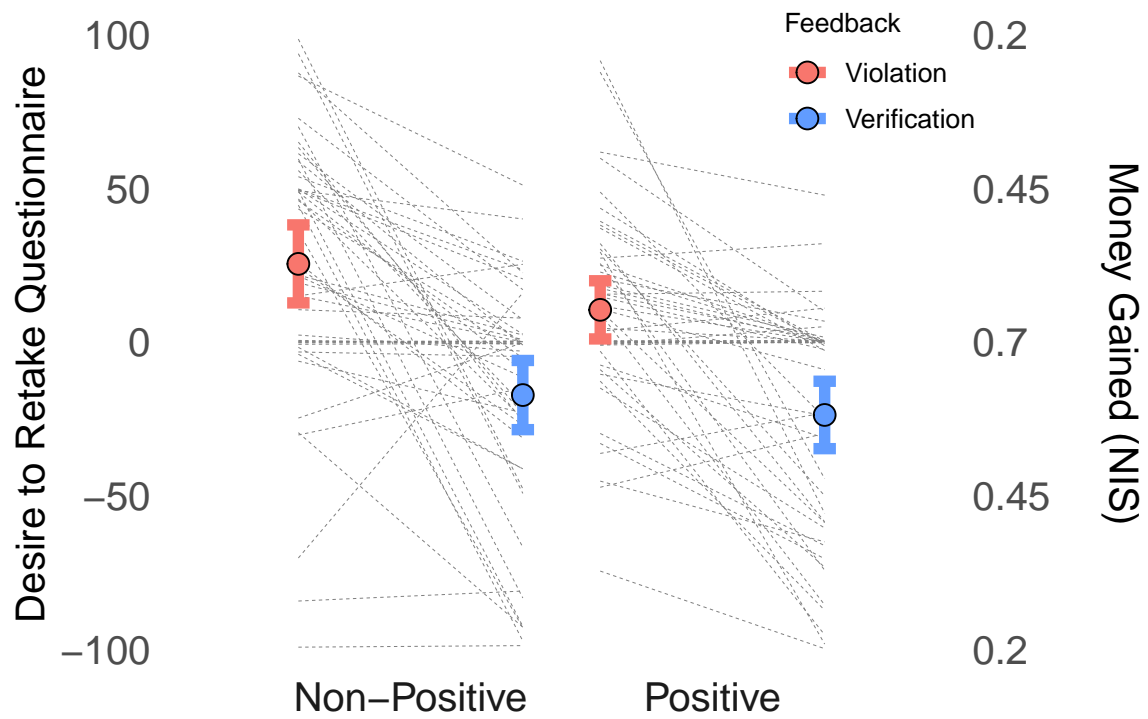

Figure 1: Gray lines represent the average response of each participant at each condition.  
Colored means and error bars generated from the Effect Coded Main Model

## 4.2 Comparing Replication Data to Original Data

As reported above, the main model revealed a significant main effect for feedback and for valence, similar to the results in study 1 (which is replicated here). To examine whether there is a difference between the original data and the replication we combined the data and created one major model with a study variable:

Table 5: Fixed Effects from Comparison Model

| term                                            | $\beta$ | SE    | t value | df      | p.value | conf.low | conf.high |
|-------------------------------------------------|---------|-------|---------|---------|---------|----------|-----------|
| Intercept                                       | 0.788   | 3.047 | 0.259   | 105.617 | 0.796   | -5.252   | 6.829     |
| Feedback<br>(Verification vs.<br>Violation)     | 16.309  | 2.765 | 5.899   | 105.405 | 0.000   | 10.827   | 21.790    |
| Valence (Positive<br>vs. Non-Positive)<br>Study | 7.285   | 1.483 | 4.913   | 104.159 | 0.000   | 4.345    | 10.225    |
| (Replication vs.<br>Original)                   | -2.046  | 4.446 | -0.460  | 104.982 | 0.646   | -10.862  | 6.769     |
| Feedback ×<br>Valence                           | 1.474   | 1.463 | 1.008   | 97.102  | 0.316   | -1.428   | 4.377     |
| Feedback ×<br>Study                             | 3.070   | 4.061 | 0.756   | 104.789 | 0.451   | -4.982   | 11.122    |
| Valence × Study                                 | -2.053  | 2.189 | -0.938  | 103.982 | 0.350   | -6.394   | 2.288     |
| Feedback ×<br>Valence × Study                   | 0.476   | 2.124 | 0.224   | 104.990 | 0.823   | -3.735   | 4.686     |

Table 6: Estimated Marginal Means: Feedback × Valence × Study

| feedback     | valence            | study          | emmean  | SE    | df      | lower.CL | upper.CL |
|--------------|--------------------|----------------|---------|-------|---------|----------|----------|
| Violation    | Non-Positive Trait | Original Study | 25.856  | 4.945 | 102.255 | 16.048   | 35.665   |
| Verification | Non-Positive Trait | Original Study | -9.710  | 4.574 | 96.520  | -18.788  | -0.631   |
| Violation    | Positive Trait     | Original Study | 8.337   | 4.081 | 90.853  | 0.231    | 16.444   |
| Verification | Positive Trait     | Original Study | -21.331 | 4.911 | 96.909  | -31.077  | -11.585  |
| Violation    | Non-Positive Trait | Replication    | 25.302  | 5.362 | 104.152 | 14.670   | 35.935   |
| Verification | Non-Positive Trait | Replication    | -17.356 | 4.972 | 98.807  | -27.221  | -7.491   |
| Violation    | Positive Trait     | Replication    | 10.939  | 4.423 | 95.837  | 2.159    | 19.718   |
| Verification | Positive Trait     | Replication    | -23.918 | 5.316 | 100.767 | -34.465  | -13.372  |

Table 7: Estimated Marginal Means: Feedback × Study

| feedback     | study          | emmean  | SE    | df      | lower.CL | upper.CL |
|--------------|----------------|---------|-------|---------|----------|----------|
| Violation    | Original Study | 17.097  | 3.911 | 105.158 | 9.343    | 24.851   |
| Verification | Original Study | -15.520 | 4.340 | 102.717 | -24.129  | -6.912   |
| Violation    | Replication    | 18.121  | 4.240 | 106.160 | 9.715    | 26.526   |
| Verification | Replication    | -20.637 | 4.714 | 103.526 | -29.985  | -11.289  |

Table 8: Estimated Marginal Means: Valence × Study

| valence            | study          | emmean | SE    | df      | lower.CL | upper.CL |
|--------------------|----------------|--------|-------|---------|----------|----------|
| Non-Positive Trait | Original Study | 8.073  | 3.537 | 100.986 | 1.056    | 15.090   |
| Positive Trait     | Original Study | -6.497 | 3.275 | 98.527  | -12.995  | 0.002    |
| Non-Positive Trait | Replication    | 3.973  | 3.841 | 102.521 | -3.645   | 11.591   |
| Positive Trait     | Replication    | -6.490 | 3.546 | 101.039 | -13.524  | 0.544    |

Table 9: Estimated Marginal Means: Valence × Study

| study          | emmean | SE    | df      | lower.CL | upper.CL |
|----------------|--------|-------|---------|----------|----------|
| Original Study | 0.788  | 3.058 | 105.615 | -5.275   | 6.851    |
| Replication    | -1.258 | 3.318 | 106.143 | -7.836   | 5.319    |

Table 10: Pairwise Comparison Between Studies

| contrast                                  | estimate | SE    | df      | t.ratio | p.value |
|-------------------------------------------|----------|-------|---------|---------|---------|
| Study Comparison (Replication - Original) | 2.046    | 4.452 | 105.014 | 0.46    | 0.647   |

As evident by these results, the different circumstances in which the replication study was conducted in (i.e., war) did not affect the participants' behavior. Our original results were replicated, as participants forwent money to retake violating and especially negatively violating questionnaires, and to avoid verifying and especially positively verifying questionnaires. Important to note, as will be demonstrated next by the GAD scores, our sample included students who came back to the university and were probably less affected by the war than students who did not return yet to the university.

### 4.3 Anxiety Mediation

General Anxiety was measured by the General Anxiety Disorder-7 (GAD-7) questionnaire (Spitzer et al., 2006). General Anxiety was coded into 2 groups as recommended in the literature (Blake et al., 2011; Clark et al., 2009; Spitzer et al., 2006)

Adding general anxiety to the main model did not impact the significance of the effect of Feedback or Valence, on the desire to retake questionnaires. We did not manage to collect a sample with a large variance of anxiety levels, and general anxiety levels did not impact the desire to retake questionnaires.

Table 11: GAD Group Counts

| Group          | Count |
|----------------|-------|
| Low GAD (<8)   | 40    |
| High GAD (>=8) | 9     |

Table 12: Descriptive Statistics

| variable  | n  | min | max | median | q1 | q3 | iqr | mad   | mean  | sd   | se    | ci  |
|-----------|----|-----|-----|--------|----|----|-----|-------|-------|------|-------|-----|
| gad.score | 49 | 0   | 19  | 4      | 3  | 7  | 4   | 2.965 | 5.286 | 3.83 | 0.547 | 1.1 |

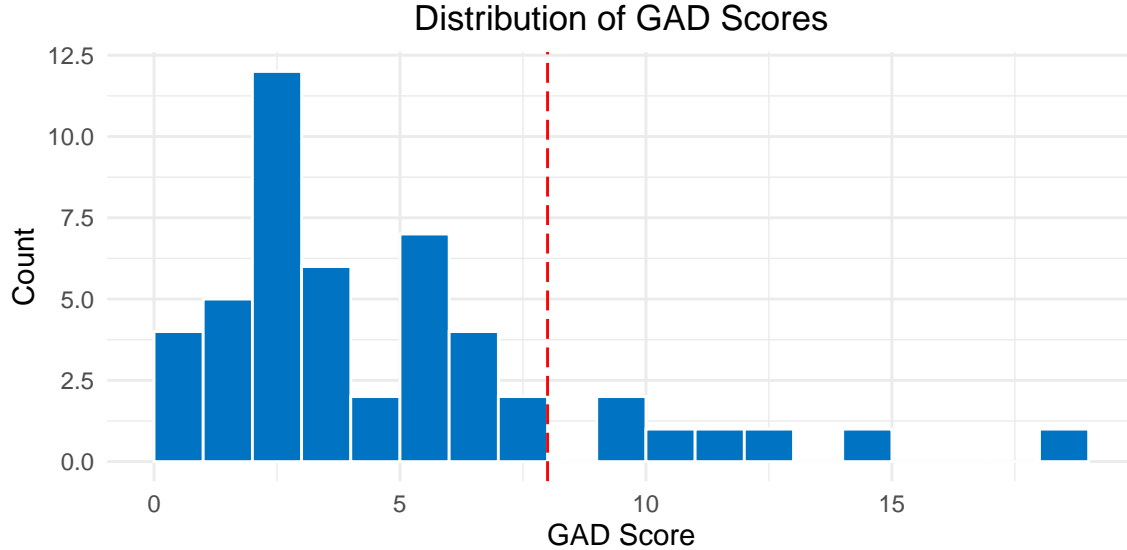

Figure 2: Dashed red line represents clinical cut-off

Table 13: Fixed Effects from GAD Model

| term                      | $\beta$ | SE    | t value | df     | p.value | conf.low | conf.high |
|---------------------------|---------|-------|---------|--------|---------|----------|-----------|
| Intercept                 | -3.138  | 5.856 | -0.536  | 47.825 | 0.595   | -14.913  | 8.638     |
| Feedback                  | 22.749  | 4.227 | 5.382   | 46.992 | 0.000   | 14.245   | 31.253    |
| Valence                   | 7.562   | 2.009 | 3.764   | 63.818 | 0.000   | 3.548    | 11.575    |
| GAD1                      | 2.572   | 5.816 | 0.442   | 46.904 | 0.660   | -9.129   | 14.272    |
| Feedback $\times$ Valence | -0.257  | 2.178 | -0.118  | 49.394 | 0.907   | -4.633   | 4.119     |
| feedback1:GAD1            | -4.942  | 4.219 | -1.171  | 46.766 | 0.247   | -13.431  | 3.548     |
| valence1:GAD1             | -3.078  | 1.989 | -1.548  | 67.237 | 0.126   | -7.048   | 0.891     |
| feedback1:valence1:GAD1   | 3.290   | 2.092 | 1.572   | 59.041 | 0.121   | -0.897   | 7.477     |

Table 14: Estimated Marginal Means: Feedback  $\times$  Valence  $\times$  GAD

| feedback     | valence            | GAD          | emmean  | SE     | df     | lower.CL | upper.CL |
|--------------|--------------------|--------------|---------|--------|--------|----------|----------|
| Violation    | Non-Positive Trait | Low Anxiety  | 24.758  | 6.860  | 48.259 | 10.967   | 38.548   |
| Verification | Non-Positive Trait | Low Anxiety  | -16.922 | 6.088  | 45.279 | -29.182  | -4.662   |
| Violation    | Positive Trait     | Low Anxiety  | 9.725   | 5.080  | 43.402 | -0.517   | 19.966   |
| Verification | Positive Trait     | Low Anxiety  | -19.823 | 5.745  | 44.686 | -31.396  | -8.251   |
| Violation    | Non-Positive Trait | High Anxiety | 29.075  | 16.506 | 47.613 | -4.120   | 62.270   |
| Verification | Non-Positive Trait | High Anxiety | -19.214 | 14.855 | 47.083 | -49.096  | 10.668   |
| Violation    | Positive Trait     | High Anxiety | 14.888  | 12.094 | 47.191 | -9.440   | 39.215   |
| Verification | Positive Trait     | High Anxiety | -47.587 | 13.986 | 47.036 | -75.723  | -19.451  |

Table 15: Estimated Marginal Means: GAD Main Effect

| GAD          | emmean | SE     | df     | lower.CL | upper.CL |
|--------------|--------|--------|--------|----------|----------|
| Low Anxiety  | -0.566 | 4.464  | 48.323 | -9.539   | 8.407    |
| High Anxiety | -5.710 | 10.817 | 47.329 | -27.466  | 16.047   |

Table 16: Pairwise Comparison Between High and Low anxiety

| contrast                                 | estimate | SE     | df     | t.ratio | p.value |
|------------------------------------------|----------|--------|--------|---------|---------|
| Anxiety Levels Comparison (High vs. Low) | 5.144    | 11.655 | 46.972 | 0.441   | 0.661   |

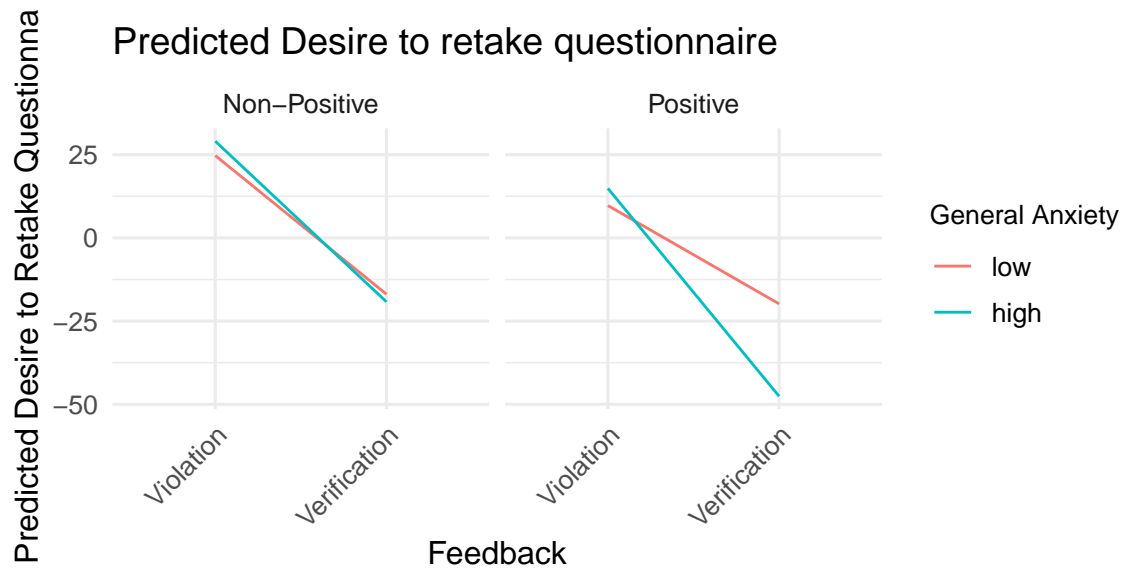

Figure 3: Interaction between Feedback, Valence, and GAD on desire to retake questionnaire. The plot displays predicted data according to `modelbased::estimate_relation`, and not original data.

#### 4.4 Self-Esteem Mediation

Self-esteem was coded into 3 groups as recommended in the literature (Echeburua, 1995; García et al., 2019; Rosenberg, 1965)

Adding self-esteem to the main model did not impact the significance of the effect of the Quadratic Feedback term or of the interaction of Valence with the Linear Feedback term, on the desire to retake questionnaires. Yet neither the self-esteem nor any of its interactions yielded a consistent significant effect on the desire to retake questionnaires.

Table 17: RSE Group Counts

| Group              | Count |
|--------------------|-------|
| Low RSE (<26)      | 7     |
| Medium RSE (26–29) | 11    |
| High RSE (>29)     | 31    |

Table 18: Descriptive Statistics

| variable  | n  | min | max | median | q1 | q3 | iqr | mad  | mean   | sd    | se    | ci    |
|-----------|----|-----|-----|--------|----|----|-----|------|--------|-------|-------|-------|
| rse.score | 49 | 19  | 40  | 31     | 29 | 35 | 6   | 5.93 | 31.388 | 5.053 | 0.722 | 1.451 |

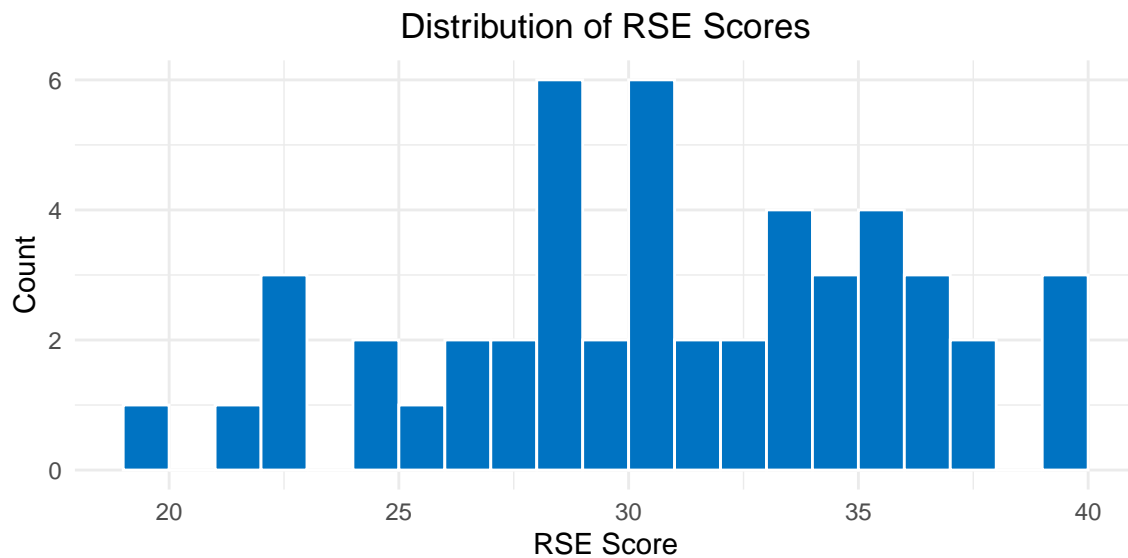

Table 19: Fixed Effects from RSE Model

| term                                                  | $\beta$ | SE    | t value | df     | p.value | conf.low | conf.high |
|-------------------------------------------------------|---------|-------|---------|--------|---------|----------|-----------|
| Intercept                                             | -2.301  | 4.995 | -0.461  | 47.248 | 0.647   | -12.349  | 7.747     |
| Feedback                                              | 18.052  | 3.649 | 4.947   | 46.026 | 0.000   | 10.707   | 25.398    |
| Valence                                               | 4.184   | 1.684 | 2.485   | 59.055 | 0.016   | 0.814    | 7.553     |
| RSE (Medium vs. Low)                                  | -5.379  | 7.981 | -0.674  | 45.918 | 0.504   | -21.445  | 10.686    |
| RSE (High vs. Medium)                                 | 4.021   | 7.029 | 0.572   | 45.921 | 0.570   | -10.127  | 18.170    |
| Feedback $\times$ Valence                             | 1.957   | 1.866 | 1.049   | 39.943 | 0.301   | -1.815   | 5.729     |
| Feedback $\times$ RSE (Med vs. Low)                   | -2.383  | 5.879 | -0.405  | 45.830 | 0.687   | -14.219  | 9.453     |
| Feedback $\times$ RSE (High vs. Med)                  | 0.060   | 5.179 | 0.012   | 45.873 | 0.991   | -10.366  | 10.486    |
| Valence $\times$ RSE (Med vs. Low)                    | -4.048  | 2.670 | -1.516  | 67.225 | 0.134   | -9.377   | 1.281     |
| Valence $\times$ RSE (High vs. Med)                   | 1.980   | 2.354 | 0.841   | 67.184 | 0.403   | -2.717   | 6.678     |
| Feedback $\times$ Valence $\times$ RSE (Med vs. Low)  | -2.231  | 2.859 | -0.781  | 52.836 | 0.439   | -7.965   | 3.503     |
| Feedback $\times$ Valence $\times$ RSE (High vs. Med) | 2.286   | 2.517 | 0.908   | 52.698 | 0.368   | -2.763   | 7.336     |

Table 20: Estimated Marginal Means from Self-Esteem Model

| feedback     | valence            | RSE    | emmean  | SE     | df     | lower.CL | upper.CL |
|--------------|--------------------|--------|---------|--------|--------|----------|----------|
| Violation    | Non-Positive Trait | Low    | 7.851   | 16.473 | 46.624 | -25.296  | 40.999   |
| Verification | Non-Positive Trait | Low    | -22.939 | 14.907 | 46.191 | -52.942  | 7.063    |
| Violation    | Positive Trait     | Low    | 8.128   | 12.300 | 46.307 | -16.626  | 32.883   |
| Verification | Positive Trait     | Low    | -23.760 | 14.491 | 46.179 | -52.925  | 5.405    |
| Violation    | Non-Positive Trait | Medium | 30.240  | 13.173 | 46.891 | 3.739    | 56.741   |
| Verification | Non-Positive Trait | Medium | -14.471 | 11.909 | 46.209 | -38.439  | 9.498    |
| Violation    | Positive Trait     | Medium | 9.425   | 9.894  | 46.973 | -10.479  | 29.330   |
| Verification | Positive Trait     | Medium | -18.313 | 11.544 | 46.162 | -41.547  | 4.921    |
| Violation    | Non-Positive Trait | High   | 27.586  | 7.891  | 47.305 | 11.715   | 43.457   |
| Verification | Non-Positive Trait | High   | -16.969 | 7.124  | 45.540 | -31.312  | -2.625   |
| Violation    | Positive Trait     | High   | 11.279  | 5.922  | 44.870 | -0.649   | 23.208   |
| Verification | Positive Trait     | High   | -25.668 | 6.911  | 45.396 | -39.585  | -11.751  |

Table 21: Estimated Marginal Means at the different Self-Esteem levels

| RSE    | emmean | SE     | df     | lower.CL | upper.CL |
|--------|--------|--------|--------|----------|----------|
| Low    | -7.680 | 10.913 | 46.405 | -29.641  | 14.281   |
| Medium | 1.720  | 8.720  | 46.638 | -15.825  | 19.265   |
| High   | -0.943 | 5.224  | 47.328 | -11.451  | 9.566    |

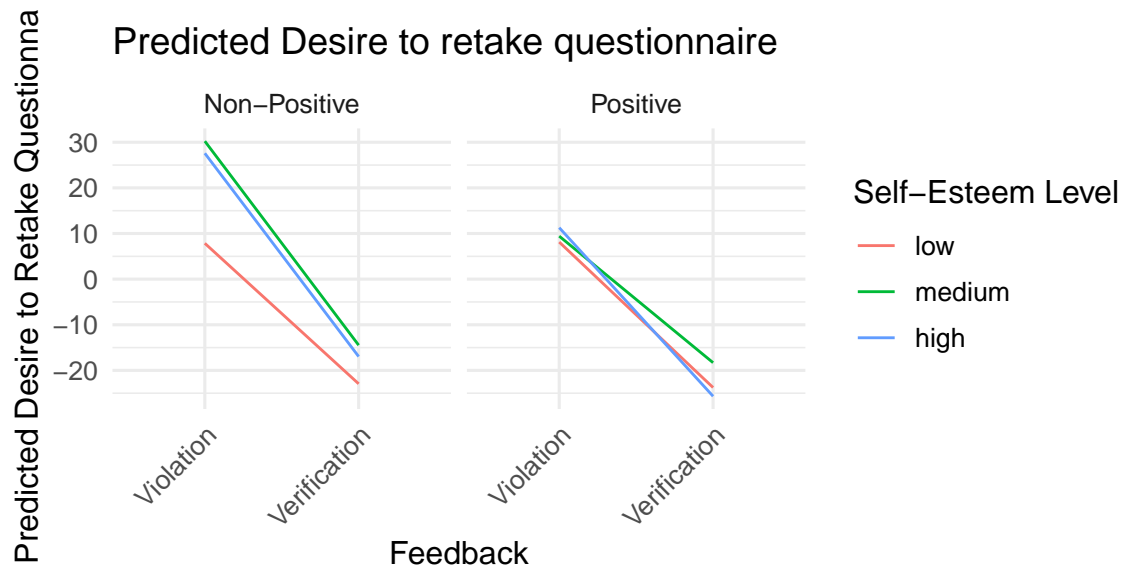

Figure 4: Interaction between Feedback, Valence, and RSE on desire to retake questionnaire. The plot displays predicted data according to `modelbased::estimate_relation`, and not original data.

#### 4.5 Trait Centrality Model

For each trait, participants rated how central that trait is to them. Centrality was significantly correlated with trait self-rating

Pearson correlation:  $r(782) = 0.53$ ,  $t = 17.56$ ,  $p < .001$ .

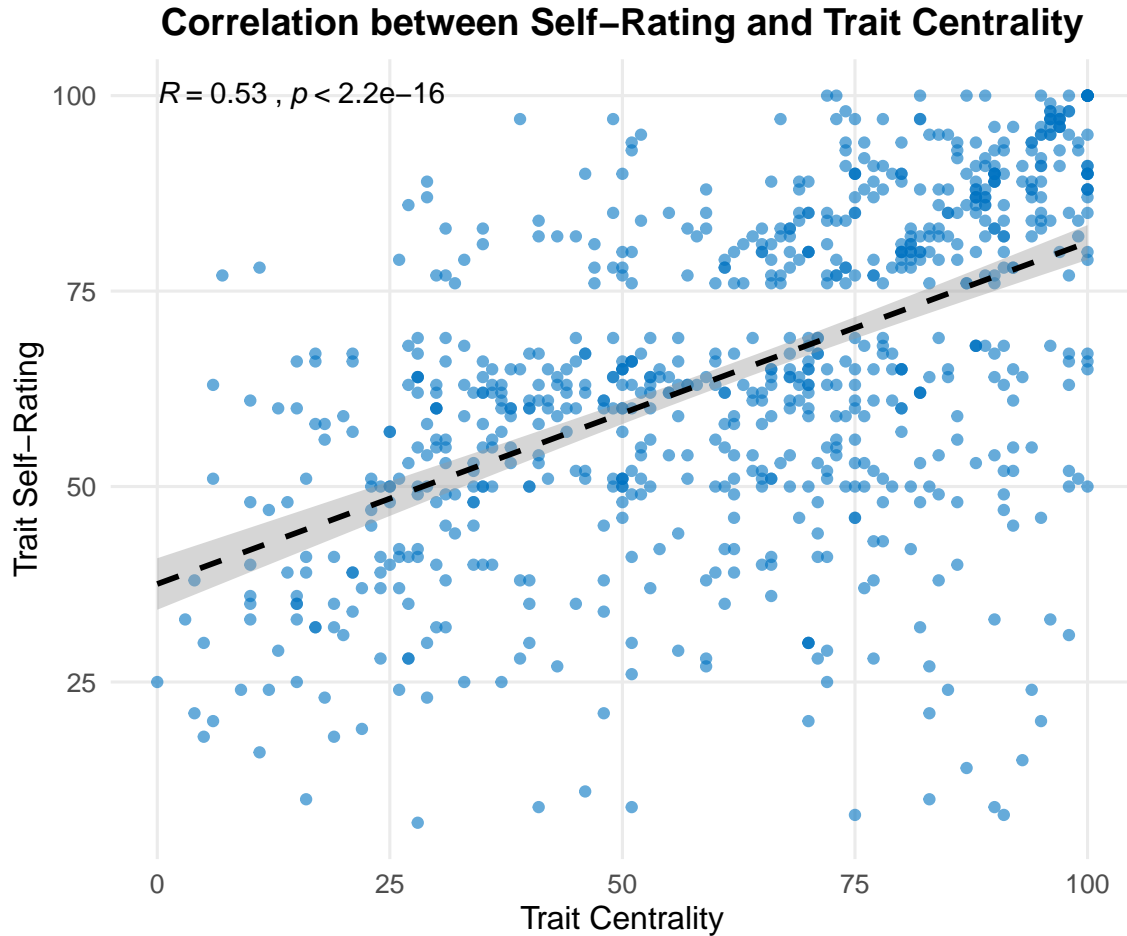

Figure 5: Correlation between self-rating and trait centrality

To help the interpretation of the centrality model, we person-mean centered centrality.

Adding trait centrality (centered) to the main model did not impact the significance of the effect of Feedback or Valence on the desire to retake questionnaires. Yet neither the trait centrality or its interaction with feedback, with valence or their three-way interaction, had a significant or consistent (across studies) effect on the desire to retake questionnaires.

Table 22: Fixed Effects from Centrality Model

| term                                          | $\beta$ | SE    | t value | df      | p.value | conf.low | conf.high |
|-----------------------------------------------|---------|-------|---------|---------|---------|----------|-----------|
| Intercept                                     | -1.566  | 4.096 | -0.382  | 49.359  | 0.704   | -9.795   | 6.664     |
| Feedback                                      | 19.195  | 3.055 | 6.283   | 48.874  | 0.000   | 13.055   | 25.335    |
| Valence                                       | 5.901   | 1.617 | 3.650   | 63.178  | 0.001   | 2.670    | 9.131     |
| Centrality                                    | 0.093   | 0.071 | 1.315   | 71.780  | 0.193   | -0.048   | 0.234     |
| Feedback $\times$ Valence                     | 1.490   | 1.837 | 0.811   | 33.686  | 0.423   | -2.244   | 5.224     |
| Feedback $\times$ Centrality                  | -0.004  | 0.064 | -0.057  | 317.502 | 0.955   | -0.130   | 0.123     |
| Valence $\times$ Centrality                   | 0.040   | 0.069 | 0.578   | 189.549 | 0.564   | -0.096   | 0.175     |
| Feedback $\times$ Valence $\times$ Centrality | 0.026   | 0.069 | 0.372   | 120.111 | 0.710   | -0.112   | 0.163     |

Table 23: Estimated Slopes of Centrality Across Feedback and Valence Conditions

| feedback     | valence            | Slope of Centrality | SE    | df     | lower.CL | upper.CL |
|--------------|--------------------|---------------------|-------|--------|----------|----------|
| Violation    | Non-Positive Trait | 0.155               | 0.136 | 32.234 | -0.122   | 0.431    |
| Verification | Non-Positive Trait | 0.110               | 0.163 | 28.318 | -0.222   | 0.443    |
| Violation    | Positive Trait     | 0.024               | 0.145 | 32.586 | -0.271   | 0.318    |
| Verification | Positive Trait     | 0.083               | 0.194 | 24.959 | -0.316   | 0.482    |

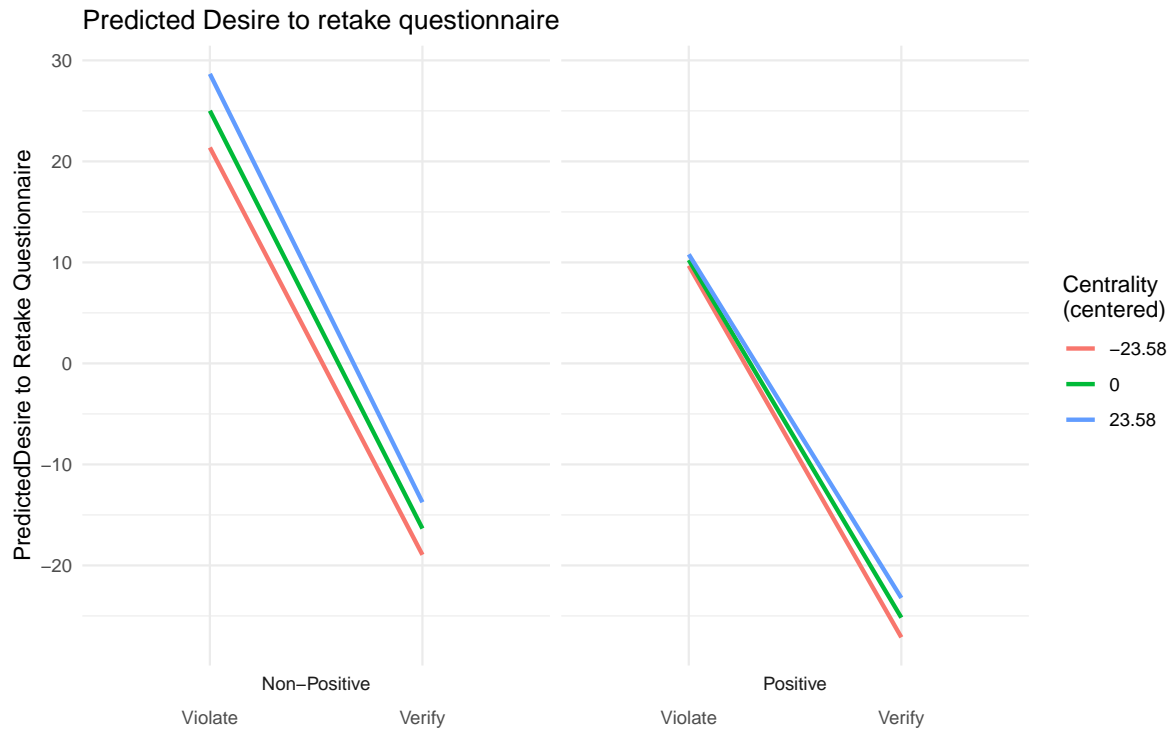

Figure 6: Interaction between Feedback, Valence, and Trait Centrality on desire to retake questionnaire. The plot displays predicted data according to `ggeffects::ggpredict`, not original data.
