# Supplementary material for: Robust preferences for information that violates one’s self-perception: the case of non-human sources
Source: Research Square preprint supplement (doi:10.21203/rs.3.rs-7511591/v1), 2025-10-15
Supplement: Supplementary file 2 [file 0e4231bfe85b512ea94d55aa.pdf]

# Supplementary 2 - Study 2

## Table of Contents

|          |                                                                                     |          |
|----------|-------------------------------------------------------------------------------------|----------|
| <b>1</b> | <b>Participant Exclusion</b>                                                        | <b>2</b> |
| <b>2</b> | <b>Stimuli - Traits and Trait Questionnaires</b>                                    | <b>3</b> |
| <b>3</b> | <b>Additional Analyses Unreported in the Paper</b>                                  | <b>9</b> |
| 3.1      | Main Model Analysis . . . . .                                                       | 9        |
| 3.1.1    | Main Model - Effect Coded (Verification vs. Violation) . . . . .                    | 9        |
| 3.1.2    | Main Model Analysis - Continuous Polynomial Feedback Independent Variable . . . . . | 11       |
| 3.1.3    | Main Model Analysis - Continuous Linear Feedback Independent Variable               | 12       |
| 3.1.4    | Main Model Analysis - Comparing the Quadratic and Linear Main Models                | 13       |
| 3.2      | Self-Esteem Mediation . . . . .                                                     | 13       |
| 3.3      | Patient Health Questionnaire - 2 . . . . .                                          | 17       |
| 3.4      | Trait Centrality Model . . . . .                                                    | 18       |

# 1 Participant Exclusion

A total of N = 85 participants began the first session of Study 2.

26 participants did not finish the study and were excluded according to pre-registered criteria:

- Seven provided in session 1 self-ratings that were unsuitable for session 2 (elaborated below).
- Eight failed comprehension checks.
- Three failed attention checks.
- Three did not return to session 2.
- Five understood the purpose of the study as evident by interview at the end of the study.

The final analysis included N = 59 participants.

## Unsuitable self-ratings-

To be eligible for the 2nd session, participants needed to provide self-rating that allow us to create 4 feedbacks for all 6 conditions-

- Higher Violation on Positive traits - a feedback higher than the self-rating (self-rating +  $30 + \text{rand}(-5:5)$ ) on a positive trait.
- Verification on Positive traits - a feedback similar to the self-rating (self-rating +  $\text{rand}(-5:5)$ ) on a positive trait.
- Negative Violation on Positive traits - a feedback lower than the self-rating (self-rating -  $30 + \text{rand}(-5:5)$ ) on a positive trait.
- Higher Violation on Negative traits - a feedback higher than the self-rating (self-rating +  $30 + \text{rand}(-5:5)$ ) on a negative trait.
- Verification on Negative traits - a feedback similar to the self-rating (self-rating +  $\text{rand}(-5:5)$ ) on a negative trait.

- Negative Violation on Negative traits - a feedback lower than the self-rating (self-rating - 30 + rand(-5:5)) on a negative trait.

To do so, an eligible participant needed to have:

- at least 4 positive traits self-rated lower than 70 &
- at least 4 different positive traits self-rated higher than 30 &
- at least 4 negative traits self-rated lower than 70 &
- at least 4 (different) negative traits self-rated higher than 30

## 2 Stimuli - Traits and Trait Questionnaires

Traits were taken from the paper E-millim (Armony-Sivan et al., 2013), in which participants received random Hebrew words and rated them either on valence, i.e., how positive or negative the word is, or on arousal. Both scales ranged from 1-9.

The chosen traits for Study 2, positive & negative Hebrew traits, and their rating are presented in Table 1 (data from the E-millim paper). “N valence” and “N Arousal” refer to the number of participants who rated the word on each scale. The trait questionnaires were originally written in Hebrew, for the supplementary materials Table 2 displays a rough translation to English by ChatGPT. “Original Length” refers to the number of characters (including spaces) in all 3 original Hebrew questionnaires, which we controlled for. Question order was randomized for each trait for each participant.

Table 1: Traits used in Study 2 as Stimuli (data from E-millim)

| Valence Category | Trait English | Trait Hebrew | N valence | Mean valence | SD valence | N arousal | Mean arousal | SD arousal |
|------------------|---------------|--------------|-----------|--------------|------------|-----------|--------------|------------|
| Positive         | brave         | אומץ         | 27        | 7.890000     | 1.000000   | 25        | 6.080000     | 2.320000   |
| Positive         | responsible   | אחריות       | 27        | 7.040000     | 1.380000   | 25        | 7.040000     | 2.210000   |
| Positive         | empathic      | אמפטיה       | 27        | 7.300000     | 0.920000   | 25        | 5.840000     | 2.430000   |
| Positive         | decisive      | החלטיות      | 33        | 7.000000     | 1.340000   | 33        | 5.670000     | 1.920000   |
| Positive         | persevering   | התמדה        | 32        | 7.410000     | 1.640000   | 33        | 5.850000     | 2.140000   |
| Positive         | initiative    | יוזמה        | 31        | 7.260000     | 1.030000   | 32        | 6.880000     | 1.570000   |

|          |               |           |    |          |          |    |          |          |
|----------|---------------|-----------|----|----------|----------|----|----------|----------|
| Positive | stable        | יציבות    | 27 | 7.410000 | 1.200000 | 24 | 5.790000 | 2.660000 |
| Positive | creative      | יצירתיות  | 21 | 7.810000 | 1.170000 | 23 | 7.000000 | 1.830000 |
| Positive | charismatic   | כריזמה    | 32 | 7.560000 | 1.460000 | 32 | 6.560000 | 2.370000 |
| Positive | moral         | מוסריות   | 32 | 7.940000 | 1.060000 | 32 | 6.310000 | 2.630000 |
| Positive | loyal         | נאמנות    | 33 | 8.000000 | 1.230000 | 33 | 6.270000 | 2.610000 |
| Positive | patient       | סבלנות    | 27 | 7.370000 | 1.110000 | 25 | 5.480000 | 2.740000 |
| Positive | spontaneous   | ספונטניות | 32 | 7.280000 | 1.210000 | 32 | 5.750000 | 2.570000 |
| Positive | gentle        | עדינות    | 33 | 7.060000 | 1.280000 | 31 | 4.680000 | 2.280000 |
| Positive | joyful        | עליזות    | 32 | 7.340000 | 1.270000 | 33 | 5.700000 | 2.540000 |
| Positive | consistent    | עקביות    | 27 | 6.670000 | 1.340000 | 25 | 5.480000 | 2.250000 |
| Positive | spiritual     | רוחניות   | 22 | 6.480000 | 1.890000 | 23 | 5.700000 | 3.140000 |
| Positive | romantic      | רומנטיות  | 33 | 7.790000 | 1.230000 | 33 | 6.360000 | 2.160000 |
| Positive | rational      | ציונאליות | 27 | 6.810000 | 1.300000 | 25 | 5.240000 | 2.370000 |
| Positive | serious       | רצינות    | 32 | 6.340000 | 1.540000 | 33 | 5.520000 | 2.180000 |
| Negative | selfish       | אנוכיות   | 21 | 2.810000 | 1.030000 | 23 | 5.090000 | 2.500000 |
| Negative | worrisome     | דאגנות    | 31 | 4.230000 | 1.930000 | 33 | 6.120000 | 1.950000 |
| Negative | dramatic      | דרמטיות   | 32 | 4.130000 | 1.880000 | 33 | 5.940000 | 2.000000 |
| Negative | materialistic | חומרנות   | 23 | 4.000000 | 2.150000 | 23 | 4.700000 | 2.270000 |
| Negative | cheeky        | חוצפה     | 35 | 2.800000 | 1.690000 | 38 | 5.760000 | 2.470000 |
| Negative | flatterer     | חנפנות    | 33 | 2.550000 | 1.560000 | 33 | 4.970000 | 2.190000 |
| Negative | conceited     | יהירות    | 31 | 2.940000 | 1.910000 | 33 | 6.450000 | 2.070000 |
| Negative | childish      | ילדותיות  | 27 | 4.220000 | 2.170000 | 25 | 4.920000 | 2.890000 |
| Negative | stressed      | לחץ       | 41 | 2.780488 | 1.387663 | 34 | 6.941177 | 2.187307 |
| Negative | rebellious    | מרדנות    | 30 | 3.500000 | 1.590000 | 33 | 6.090000 | 2.250000 |
| Negative | vengefull     | נקמנות    | 31 | 2.260000 | 1.670000 | 31 | 6.390000 | 2.260000 |
| Negative | close         | סגירות    | 31 | 3.580000 | 1.730000 | 32 | 4.720000 | 2.450000 |
| Negative | lazy          | עצלנות    | 32 | 2.560000 | 1.610000 | 33 | 4.730000 | 2.680000 |
| Negative | cheap         | קמצנות    | 17 | 1.940000 | 0.980000 | 15 | 5.330000 | 2.990000 |
| Negative | jealous       | קנאה      | 36 | 2.420000 | 1.160000 | 38 | 6.210000 | 2.540000 |
| Negative | cold          | קרירות    | 30 | 3.000000 | 1.280000 | 32 | 4.440000 | 2.290000 |
| Negative | corrupt       | שחיתות    | 32 | 1.970000 | 1.130000 | 32 | 6.190000 | 2.110000 |
| Negative | domineering   | שתלטנות   | 29 | 2.860000 | 1.290000 | 31 | 6.390000 | 2.030000 |
| Negative | dependent     | תלותיות   | 32 | 2.840000 | 1.450000 | 33 | 5.330000 | 2.370000 |
| Negative | assertive     | תקיפות    | 31 | 3.320000 | 1.680000 | 33 | 6.670000 | 1.700000 |

Table 2: Trait Questionnaires used in Study 2 as Stimuli

| Valence Category | Trait English | Trait Hebrew | Question 1                                            | Question 2                                             | Question 3 (reversed)                                     | Original Length |
|------------------|---------------|--------------|-------------------------------------------------------|--------------------------------------------------------|-----------------------------------------------------------|-----------------|
| Positive         | brave         | אומץ         | I tend to engage in risky behavior                    | It's easy for me to function properly under danger     | I try to avoid situations where I might get hurt          | 95              |
| Positive         | responsible   | אחריות       | I make sure to perform tasks assigned to me well      | I tend to double-check my actions                      | I try to shake off mistakes I made                        | 98              |
| Positive         | empathic      | אמפטיה       | I often express compassion for others' suffering      | It's easy for me to recognize others' emotional states | I believe someone else's suffering is their own business  | 96              |
| Positive         | decisive      | החלטיות      | I tend to stick to a decision I've made               | I can make decisions quickly                           | It's hard for me to choose between two similar products   | 92              |
| Positive         | persevering   | התמדה        | It's important for me to finish what I started        | I don't tend to give up when facing difficulty         | I tend to switch between tasks to keep things interesting | 97              |
| Positive         | initiative    | יוזמה        | It's easy for me to get others on board with my ideas | I tend to take on more than required                   | I prefer working as part of a pre-defined task            | 95              |
| Positive         | stable        | יציבות       | I have frequent mood swings                           | Many things can easily shake me                        | I behave the same way in different situations             | 94              |
| Positive         | creative      | יצירתיות     | It's easy for me to think "outside the box"           | I often understand information differently than others | It's hard for me to generate new ideas from scratch       | 93              |
| Positive         | charismatic   | כריזמה       | People listen to me without effort on my part         | People tend to place me in leadership positions        | I tend to keep my opinions to myself                      | 92              |

|          |             |            |                                                               |                                                             |                                                        |    |
|----------|-------------|------------|---------------------------------------------------------------|-------------------------------------------------------------|--------------------------------------------------------|----|
| Positive | moral       | מוסריות    | Ethical principles guide my behavior                          | I tend to notice injustices around me                       | It's hard for me to distinguish good behavior from bad | 97 |
| Positive | loyal       | נאמנות     | I would do anything to help my friends                        | I want to keep the same friends for life                    | I cut off contact with friends who moved abroad        | 97 |
| Positive | patient     | סבלנות     | It's easy for me to wait calmly for a long time               | I don't tend to get bored easily                            | It's hard for me when things take longer than expected | 91 |
| Positive | spontaneous | ספונטניות  | I frequently change my daily schedule                         | I quickly make time for new and interesting ideas           | I struggle with changes in plans                       | 99 |
| Positive | gentle      | עדינות     | I show sensitivity to those around me                         | My conduct is characterized by politeness                   | I often speak loudly without realizing                 | 99 |
| Positive | joyful      | עליזות     | I usually see the glass as half full                          | Most of the time my mood is cheerful                        | I see the world as a gloomy place                      | 90 |
| Positive | consistent  | עקביות     | I tend to repeat similar behavioral patterns                  | I try to create a regular daily routine                     | I frequently change my opinions and stances            | 96 |
| Positive | spiritual   | רוחניות    | I believe in a higher power                                   | I believe I'm part of something greater                     | I struggle to believe in things I can't see            | 93 |
| Positive | romantic    | רומנטיות   | I always prefer intimate dinners                              | When I'm in a relationship, I try to excite and surprise    | I will choose a partner based on rational reasons      | 97 |
| Positive | rational    | רציונאליות | It's hard for me to complete irrational tasks                 | It's important for me to list pros and cons before deciding | My emotions control my actions                         | 95 |
| Positive | serious     | רצינות     | It's important for me to keep my commitments                  | It's hard for me to speak without prior thought             | I often make fun of myself                             | 91 |
| Negative | selfish     | אנוכיות    | My personal well-being is more important than the common good | I won't go out of my way to help strangers                  | I try to consider others' needs too                    | 94 |

|          |               |          |                                                      |                                                                 |                                                                |    |
|----------|---------------|----------|------------------------------------------------------|-----------------------------------------------------------------|----------------------------------------------------------------|----|
| Negative | worrisome     | דאגנות   | I tend to have many daily worries                    | I worry a lot about my loved ones                               | Others turn to me during stress to calm down                   | 98 |
| Negative | dramatic      | דרמטיות  | I often express emotions in an exaggerated way       | I tend to get emotional over trivial events                     | I tend to describe events without exaggerating                 | 97 |
| Negative | materialistic | חומרנות  | I prefer branded products                            | I often buy new clothes                                         | I prefer to invest my money in experiences rather than objects | 92 |
| Negative | cheeky        | חוצפה    | Others say my behavior is disrespectful              | I tend to dismiss others' ideas                                 | It's important to me not to hurt others                        | 93 |
| Negative | flatterer     | חנפנות   | I prefer telling people what they want to hear       | I compliment others often                                       | It's hard for me to hide negative feelings toward others       | 95 |
| Negative | conceited     | יהירות   | I tend to be proud of myself and my actions          | I tend to downplay others' achievements near my own             | I feel awkward talking about my successes                      | 98 |
| Negative | childish      | ילדותיות | I tend to present serious topics in a ridiculous way | I often engage in playful behavior                              | It's easy for me to delay immediate gratification              | 94 |
| Negative | stressed      | לחץ      | I tend to fear the moment things go wrong            | Many situations make me anxious and tense                       | It's easy for me to handle emergencies                         | 97 |
| Negative | rebellious    | מרדנות   | I tend to act against the rules                      | I prefer to do things my own way rather than like everyone else | I try to act as expected of me                                 | 98 |
| Negative | vengefull     | נקמנות   | I want others to be punished for their actions       | It's hard for me to channel my anger toward others              | It's easy for me to let go of moments when I was hurt          | 97 |
| Negative | close         | סגירות   | I tend to keep my emotions to myself                 | Very few people understand me                                   | I willingly share details about my past                        | 90 |
| Negative | lazy          | עצלנות   | I have no energy for unnecessary actions             | I struggle to work efficiently for long periods                 | I dedicate a lot of effort to things that matter to me         | 95 |

|          |             |         |                                                |                                                              |                                                          |    |
|----------|-------------|---------|------------------------------------------------|--------------------------------------------------------------|----------------------------------------------------------|----|
| Negative | cheap       | קמצנות  | I tend to avoid giving gifts                   | I give up luxuries to save money                             | I pay little attention to my spending                    | 96 |
| Negative | jealous     | קנאה    | I want things my friends have but I don't      | It's hard for me to genuinely celebrate others' achievements | My loved ones' talents inspire me                        | 99 |
| Negative | cold        | קרירות  | People say my face lacks expression            | It's hard for me to get excited about daily things           | I often express my emotions to those around me           | 99 |
| Negative | corrupt     | שחיתות  | I will bend rules for my personal benefit      | I will use my personal connections without hesitation        | It's important that my actions be transparent            | 89 |
| Negative | domineering | שתלטנות | It's easy for me to take charge in new places  | I want things to happen my way                               | I try to avoid imposing my opinion                       | 91 |
| Negative | dependent   | תלותיות | I tend to compromise to maintain relationships | My closest friends mean everything to me                     | I will choose to spend a lot of time alone               | 91 |
| Negative | assertive   | תקיפות  | My behavior is perceived as aggressive         | I will express my opinion clearly and strongly               | I struggle to stand my ground when faced with resistance | 98 |

*Note:*

Roughly translated from Hebrew by ChatGPT. Original length refers to N symbols in Hebrew.



### 3 Additional Analyses Unreported in the Paper

#### 3.1 Main Model Analysis

##### 3.1.1 Main Model - Effect Coded (Verification vs. Violation)

The deviation from the self-rating ('Feedback' independent variable) is modeled as a factor with 3 levels:

higher violation: 1

verification: 0

lower violation: -1

Polynomial contrast compares verification to both direction of violation.

This model acts as a sanity check for the next model and provides descriptive at each level of deviation from self-rating\*valence category.

Table 3: Fixed Effects from Main Model

| term                          | $\beta$ | std.error | statistic | df     | p.value | conf.low | conf.high |
|-------------------------------|---------|-----------|-----------|--------|---------|----------|-----------|
| Intercept                     | 1.997   | 1.783     | 1.120     | 61.864 | 0.267   | -1.568   | 5.561     |
| Feedback (Linear)             | -2.537  | 1.398     | -1.815    | 40.270 | 0.077   | -5.361   | 0.287     |
| Feedback (Quadratic)          | 15.335  | 2.799     | 5.479     | 58.310 | 0.000   | 9.733    | 20.936    |
| Valence                       | -2.127  | 0.864     | -2.462    | 40.657 | 0.018   | -3.872   | -0.382    |
| Feedback (L) $\times$ Valence | 6.894   | 2.163     | 3.187     | 55.116 | 0.002   | 2.558    | 11.229    |
| Feedback (Q) $\times$ Valence | -1.549  | 1.252     | -1.237    | 69.118 | 0.220   | -4.047   | 0.949     |

Table 4: Estimated Marginal Means: Feedback  $\times$  Valence

| feedback         | valence        | emmean  | SE    | df     | lower.CL | upper.CL |
|------------------|----------------|---------|-------|--------|----------|----------|
| Lower Violation  | Negative Trait | 2.417   | 2.909 | 52.253 | -3.420   | 8.253    |
| Verification     | Negative Trait | -11.386 | 3.593 | 55.254 | -18.585  | -4.187   |
| Higher Violation | Negative Trait | 8.578   | 2.987 | 53.200 | 2.588    | 14.569   |
| Lower Violation  | Positive Trait | 17.684  | 3.253 | 57.171 | 11.171   | 24.198   |
| Verification     | Positive Trait | -9.662  | 3.068 | 52.656 | -15.816  | -3.507   |
| Higher Violation | Positive Trait | 4.348   | 2.396 | 41.137 | -0.490   | 9.186    |

Table 5: Estimated Marginal Means: Feedback

| feedback         | emmean  | SE    | df     | lower.CL | upper.CL |
|------------------|---------|-------|--------|----------|----------|
| Lower Violation  | 10.051  | 2.529 | 58.873 | 4.991    | 15.111   |
| Verification     | -10.524 | 3.114 | 57.059 | -16.760  | -4.288   |
| Higher Violation | 6.463   | 1.826 | 46.438 | 2.789    | 10.137   |

Table 6: Estimated Marginal Means: Valence

| valence        | emmean | SE    | df     | lower.CL | upper.CL |
|----------------|--------|-------|--------|----------|----------|
| Negative Trait | -0.130 | 2.175 | 60.518 | -4.481   | 4.220    |
| Positive Trait | 4.124  | 1.780 | 56.279 | 0.559    | 7.688    |

## Participant's Desire to Retake Questionnaires

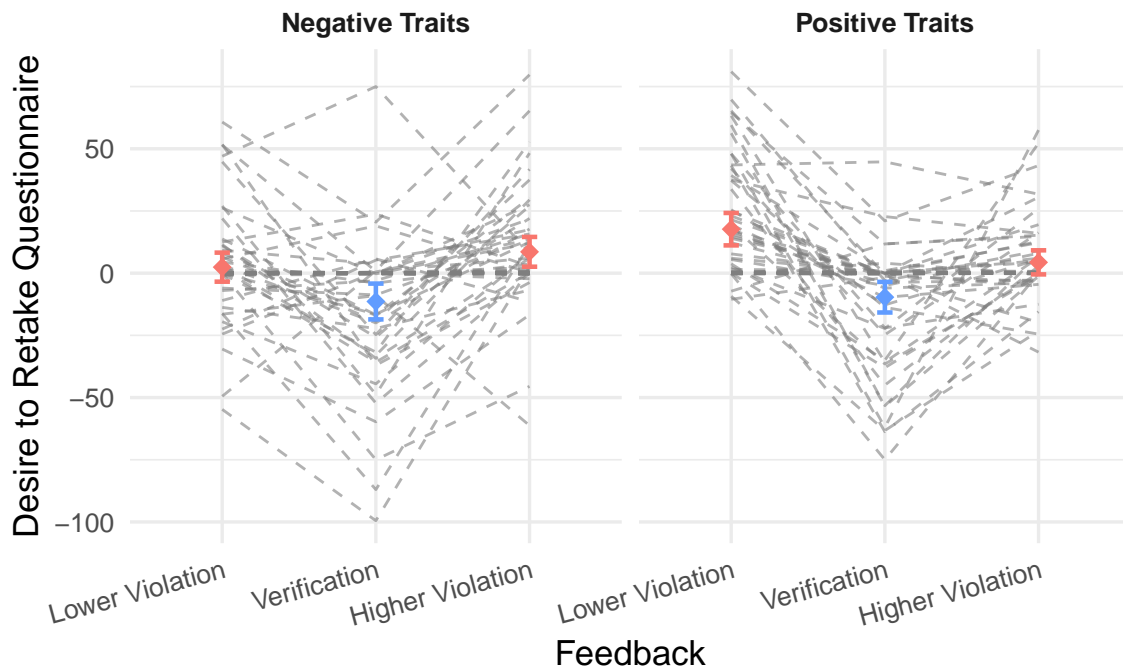

Figure 1: Gray lines represent the average response of each participant at each condition. Colored means and error bars are generated from the Effect Coded Main Model

### 3.1.2 Main Model Analysis - Continuous Polynomial Feedback Independent Variable

This model examines the hypothesis of a difference between verifying feedback and violating feedback, regardless of the direction of violation. It is reported in the manuscript, and is placed here to help compare to:

- The Effect Coded model reported above - coding method does not change the results.
- The continuous linear model reported below - the polynomial model fits the data better than the linear model.

Table 7: Fixed Effects from Quadratic Model

| term                                   | $\beta$ | std.error | statistic | df       | p.value | conf.low | conf.high |
|----------------------------------------|---------|-----------|-----------|----------|---------|----------|-----------|
| Intercept                              | -10.544 | 2.053     | -5.137    | 104.982  | 0.000   | -14.615  | -6.474    |
| Feedback (Linear)                      | -1.765  | 1.020     | -1.731    | 47.335   | 0.090   | -3.816   | 0.286     |
| Feedback <sup>2</sup> (Quadratic)      | 18.767  | 1.538     | 12.203    | 1273.927 | 0.000   | 15.750   | 21.784    |
| Valence                                | -0.876  | 1.335     | -0.656    | 221.614  | 0.512   | -3.506   | 1.754     |
| Feedback $\times$ Valence              | 4.840   | 1.545     | 3.133     | 55.682   | 0.003   | 1.744    | 7.935     |
| Feedback <sup>2</sup> $\times$ Valence | -1.820  | 1.538     | -1.184    | 1274.388 | 0.237   | -4.837   | 1.197     |

Table 8: Estimated Marginal Means by Feedback and Valence

| feedback         | valence        | emmean  | SE    | df      | lower.CL | upper.CL |
|------------------|----------------|---------|-------|---------|----------|----------|
| Lower Violation  | Negative Trait | 2.452   | 3.187 | 61.339  | -3.920   | 8.824    |
| Verification     | Negative Trait | -11.420 | 2.596 | 119.078 | -16.561  | -6.280   |
| Higher Violation | Negative Trait | 8.601   | 2.736 | 52.570  | 3.113    | 14.090   |
| Lower Violation  | Positive Trait | 17.523  | 2.937 | 58.985  | 11.647   | 23.399   |
| Verification     | Positive Trait | -9.669  | 2.294 | 139.846 | -14.205  | -5.132   |
| Higher Violation | Positive Trait | 4.314   | 2.361 | 43.640  | -0.446   | 9.075    |

Table 9: Slope of Feedback by Valence (emtrends)

| valence        | Feedback Slope | SE    | df     | lower.CL | upper.CL |
|----------------|----------------|-------|--------|----------|----------|
| Negative Trait | 3.109          | 1.889 | 43.998 | -0.699   | 6.916    |
| Positive Trait | -6.563         | 1.827 | 41.968 | -10.251  | -2.875   |

Table 10: Pairwise Comparison of Feedback Slopes by Valence

| contrast         | estimate | SE    | df     | t.ratio | p.value |
|------------------|----------|-------|--------|---------|---------|
| Slope Comparison | 9.672    | 3.099 | 51.023 | 3.121   | 0.003   |

### 3.1.3 Main Model Analysis - Continuous Linear Feedback Independent Variable

This model examines the hypothesis of self-enhancement, that is people will prefer a positively violating feedback more than a verifying one, and prefer a verifying feedback over a negatively violating one. Following the model results are the comparison to the quadratic model reported above.

Table 11: Fixed Effects from Linear Model

| term                      | $\beta$ | std.error | statistic | df      | p.value | conf.low | conf.high |
|---------------------------|---------|-----------|-----------|---------|---------|----------|-----------|
| Intercept                 | 1.467   | 1.759     | 0.834     | 59.696  | 0.408   | -2.051   | 4.985     |
| Feedback                  | -1.752  | 1.283     | -1.365    | 34.841  | 0.181   | -4.356   | 0.853     |
| Valence                   | -1.949  | 0.849     | -2.297    | 101.316 | 0.024   | -3.632   | -0.266    |
| Feedback $\times$ Valence | 5.033   | 1.694     | 2.971     | 54.550  | 0.004   | 1.637    | 8.429     |

Table 12: Estimated Marginal Means by Feedback and Valence

| feedback         | valence        | emmean | SE    | df     | lower.CL | upper.CL |
|------------------|----------------|--------|-------|--------|----------|----------|
| Lower Violation  | Negative Trait | -3.764 | 3.264 | 56.792 | -10.301  | 2.774    |
| Verification     | Negative Trait | -0.482 | 2.133 | 54.156 | -4.759   | 3.795    |
| Higher Violation | Negative Trait | 2.799  | 2.790 | 48.509 | -2.808   | 8.407    |
| Lower Violation  | Positive Trait | 10.201 | 3.041 | 52.694 | 4.101    | 16.300   |
| Verification     | Positive Trait | 3.416  | 1.762 | 48.066 | -0.127   | 6.959    |
| Higher Violation | Positive Trait | -3.369 | 2.413 | 39.178 | -8.249   | 1.512    |

Table 13: Slope of Feedback by Valence (emtrends)

| valence        | Feedback Slope | SE    | df     | lower.CL | upper.CL |
|----------------|----------------|-------|--------|----------|----------|
| Negative Trait | 3.282          | 2.161 | 46.740 | -1.065   | 7.629    |
| Positive Trait | -6.785         | 2.104 | 44.305 | -11.025  | -2.544   |

Table 14: Pairwise Comparison of Feedback Slopes by Valence

| contrast         | estimate | SE    | df     | t.ratio | p.value |
|------------------|----------|-------|--------|---------|---------|
| Slope Comparison | 10.066   | 3.398 | 54.458 | 2.962   | 0.005   |

### 3.1.4 Main Model Analysis - Comparing the Quadratic and Linear Main Models

As displayed in Table 15, the Quadratic Model describes the data better than the Linear Model. for that reason, all further analyses were conducted only using the Quadratic Model.

Table 15: Model Comparison: Quadratic vs. Linear

|                 | npar | AIC      | BIC      | logLik    | -2*log(L) | Chisq   | Df | Pr(>Chisq) |
|-----------------|------|----------|----------|-----------|-----------|---------|----|------------|
| linear_model    | 18   | 13715.08 | 13809.68 | -6839.539 | 13679.08  | NA      | NA | NA         |
| quadratic_model | 20   | 13579.34 | 13684.45 | -6769.671 | 13539.34  | 139.737 | 2  | 0          |

## 3.2 Self-Esteem Mediation

Self-esteem was coded into 3 groups as recommended in the literature (Echeburua, 1995; García et al., 2019; Rosenberg, 1965)

Adding self-esteem to the main model did impact the significance of the effect of the Quadratic Feedback term or of the interaction of Valence with the Linear Feedback term, on the desire to retake questionnaires. Yet neither the self-esteem nor any of its interactions yielded a consistent significant effect (across studies) on the desire to retake questionnaires.

Table 16: RSE Group Counts

| Group              | Count |
|--------------------|-------|
| Low RSE (<26)      | 10    |
| Medium RSE (26–29) | 15    |
| High RSE (>29)     | 34    |

Table 17: Descriptive Statistics

| variable  | n  | min | max | median | q1 | q3 | iqr | mad   | mean   | sd    | se    | ci    |
|-----------|----|-----|-----|--------|----|----|-----|-------|--------|-------|-------|-------|
| rse.score | 59 | 18  | 40  | 30     | 27 | 33 | 6   | 4.448 | 29.966 | 5.017 | 0.653 | 1.307 |

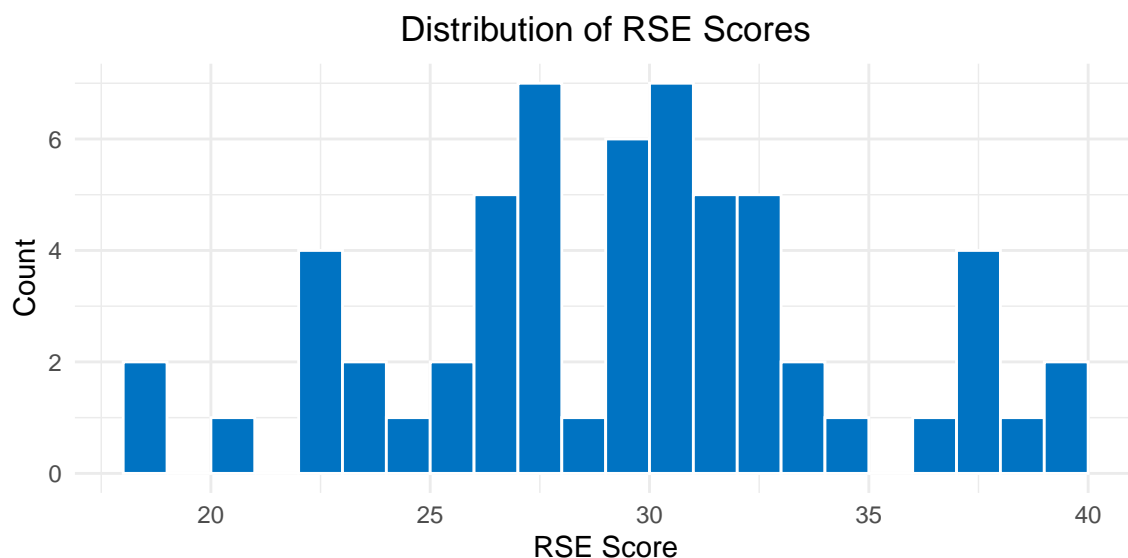

Table 18: Fixed Effects from Self-Esteem Model with Quadratic Feedback Term

| term                                       | $\beta$ | SE    | t value | df       | p.value | conf.low | conf.high |
|--------------------------------------------|---------|-------|---------|----------|---------|----------|-----------|
| Intercept                                  | -9.858  | 2.379 | -4.145  | 101.039  | 0.000   | -14.577  | -5.140    |
| Feedback (Linear)                          | -1.958  | 1.186 | -1.651  | 60.282   | 0.104   | -4.330   | 0.414     |
| Valence                                    | 0.003   | 1.515 | 0.002   | 320.166  | 0.998   | -2.978   | 2.984     |
| RSE                                        | 6.737   | 3.808 | 1.769   | 99.009   | 0.080   | -0.819   | 14.293    |
| RSE2                                       | -7.145  | 3.248 | -2.200  | 98.868   | 0.030   | -13.590  | -0.700    |
| Feedback (Quadratic)                       | 18.751  | 1.763 | 10.639  | 1275.701 | 0.000   | 15.293   | 22.209    |
| Feedback (L) $\times$ Valence              | 5.725   | 1.741 | 3.289   | 57.628   | 0.002   | 2.240    | 9.210     |
| Feedback (L) $\times$ RSE                  | 0.554   | 1.740 | 0.318   | 225.206  | 0.751   | -2.876   | 3.983     |
| feedback:RSE2                              | -1.404  | 1.486 | -0.945  | 225.888  | 0.346   | -4.332   | 1.525     |
| Valence $\times$ RSE                       | 2.317   | 2.370 | 0.978   | 826.197  | 0.329   | -2.336   | 6.969     |
| valence1:RSE2                              | -0.289  | 2.021 | -0.143  | 825.309  | 0.886   | -4.254   | 3.677     |
| valence1:l(feedback^2)                     | -2.258  | 1.762 | -1.281  | 1275.979 | 0.200   | -5.716   | 1.200     |
| RSE1:l(feedback^2)                         | -6.855  | 2.861 | -2.396  | 1267.718 | 0.017   | -12.468  | -1.242    |
| RSE2:l(feedback^2)                         | 9.676   | 2.439 | 3.967   | 1276.234 | 0.000   | 4.891    | 14.460    |
| Feedback (L) $\times$ Valence $\times$ RSE | -1.212  | 2.706 | -0.448  | 56.126   | 0.656   | -6.632   | 4.208     |
| feedback:valence1:RSE2                     | 4.559   | 2.310 | 1.974   | 56.186   | 0.053   | -0.068   | 9.185     |
| valence1:RSE1:l(feedback^2)                | 0.998   | 2.861 | 0.349   | 1267.375 | 0.727   | -4.615   | 6.611     |
| valence1:RSE2:l(feedback^2)                | -2.992  | 2.439 | -1.227  | 1275.965 | 0.220   | -7.776   | 1.793     |

Table 19: Estimated Marginal Means from Self-Esteem Model

| feedback         | valence        | RSE    | emmean  | SE    | df      | lower.CL | upper.CL |
|------------------|----------------|--------|---------|-------|---------|----------|----------|
| Lower Violation  | Negative Trait | Low    | 6.725   | 7.639 | 67.040  | -8.523   | 21.973   |
| Verification     | Negative Trait | Low    | -0.802  | 6.521 | 121.248 | -13.712  | 12.109   |
| Higher Violation | Negative Trait | Low    | 12.942  | 7.020 | 63.963  | -1.082   | 26.966   |
| Lower Violation  | Positive Trait | Low    | 13.632  | 6.926 | 69.091  | -0.184   | 27.447   |
| Verification     | Positive Trait | Low    | -5.442  | 5.772 | 158.563 | -16.841  | 5.958    |
| Higher Violation | Positive Trait | Low    | 1.797   | 5.970 | 67.016  | -10.118  | 13.713   |
| Lower Violation  | Negative Trait | Medium | -1.034  | 5.822 | 69.060  | -12.650  | 10.581   |
| Verification     | Negative Trait | Medium | -17.289 | 4.901 | 121.666 | -26.992  | -7.586   |
| Higher Violation | Negative Trait | Medium | 12.810  | 5.267 | 63.080  | 2.285    | 23.335   |
| Lower Violation  | Positive Trait | Medium | 30.603  | 5.275 | 70.638  | 20.085   | 41.122   |
| Verification     | Positive Trait | Medium | -16.718 | 4.341 | 158.414 | -25.293  | -8.144   |
| Higher Violation | Positive Trait | Medium | 3.312   | 4.484 | 64.489  | -5.645   | 12.269   |
| Lower Violation  | Negative Trait | High   | 2.920   | 4.096 | 68.259  | -5.253   | 11.092   |
| Verification     | Negative Trait | High   | -11.476 | 3.391 | 120.714 | -18.189  | -4.762   |
| Higher Violation | Negative Trait | High   | 5.462   | 3.616 | 59.524  | -1.772   | 12.695   |
| Lower Violation  | Positive Trait | High   | 12.256  | 3.741 | 68.597  | 4.793    | 19.720   |
| Verification     | Positive Trait | High   | -7.425  | 3.010 | 151.958 | -13.371  | -1.479   |
| Higher Violation | Positive Trait | High   | 5.283   | 3.081 | 56.521  | -0.888   | 11.453   |

Table 20: Estimated Marginal Means at the different Self-Esteem levels

| RSE    | emmean  | SE    | df      | lower.CL | upper.CL |
|--------|---------|-------|---------|----------|----------|
| Low    | -3.122  | 5.219 | 99.846  | -13.477  | 7.234    |
| Medium | -17.004 | 3.921 | 100.312 | -24.783  | -9.224   |
| High   | -9.450  | 2.708 | 100.843 | -14.822  | -4.079   |

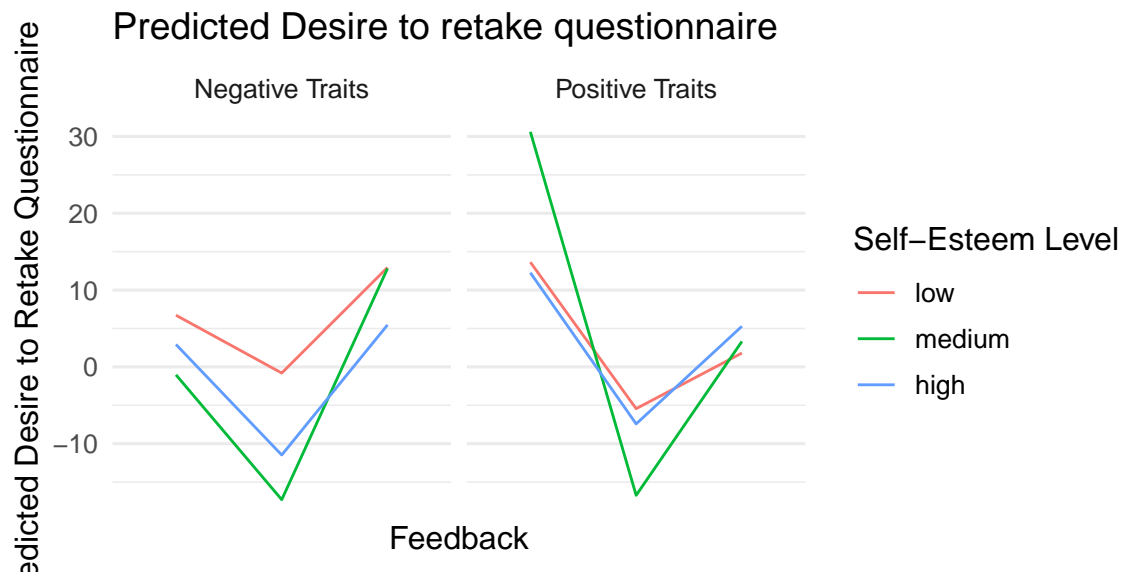

Figure 2: Interaction between Feedback, Valence, and RSE on desire to retake questionnaire. The plot displays predicted data according to `modelbased::estimate_relation`, and not original data.



### 3.3 Patient Health Questionnaire - 2

PHQ-2 was used as an estimate for depression tendency, yet we did not find enough variance in our sample to analyze relevant results

Table 21: PHQ Group Counts

| Group                | Count |
|----------------------|-------|
| Low PHQ ( $\leq 3$ ) | 55    |
| High PHQ ( $> 3$ )   | 4     |

Table 22: Descriptive Statistics

| variable  | n  | min | max | median | q1 | q3 | iqr | mad   | mean  | sd    | se    | ci    |
|-----------|----|-----|-----|--------|----|----|-----|-------|-------|-------|-------|-------|
| phq.score | 59 | 0   | 6   | 2      | 1  | 2  | 1   | 1.483 | 1.627 | 1.272 | 0.166 | 0.331 |

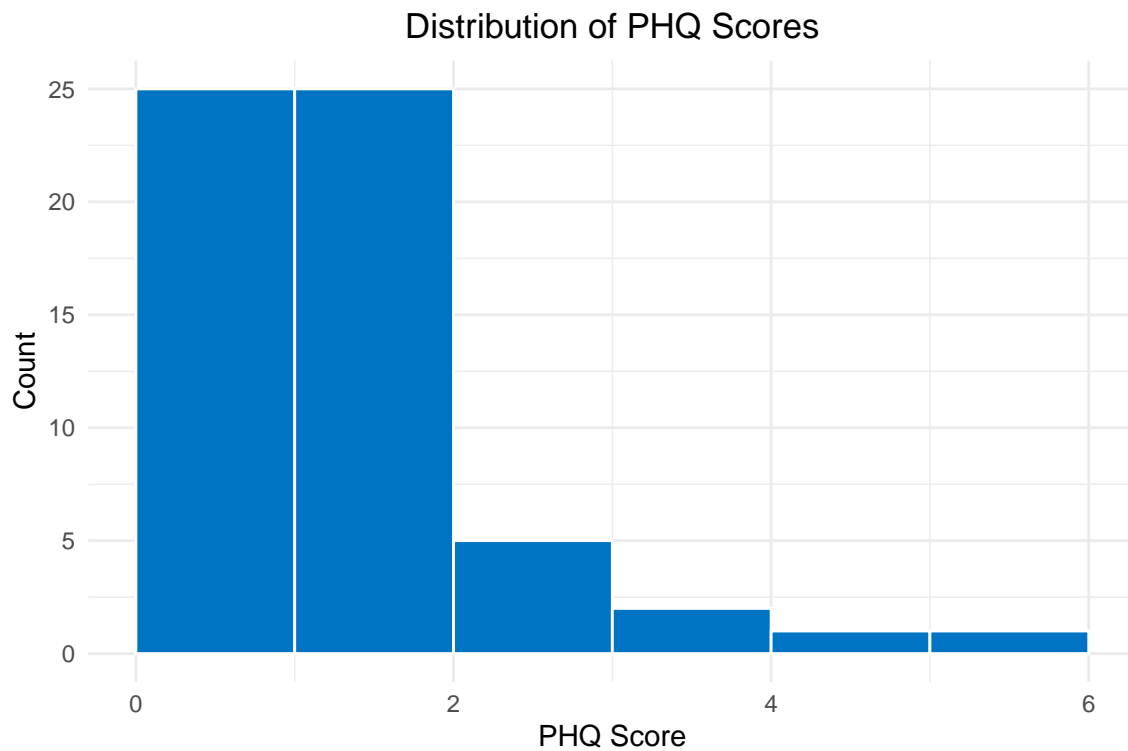

### 3.4 Trait Centrality Model

For each trait, participants rated how central that trait is to them. Centrality was significantly correlated with trait self-rating

Pearson correlation:  $r(1414) = 0.53$ ,  $t = 23.29$ ,  $p < .001$ .

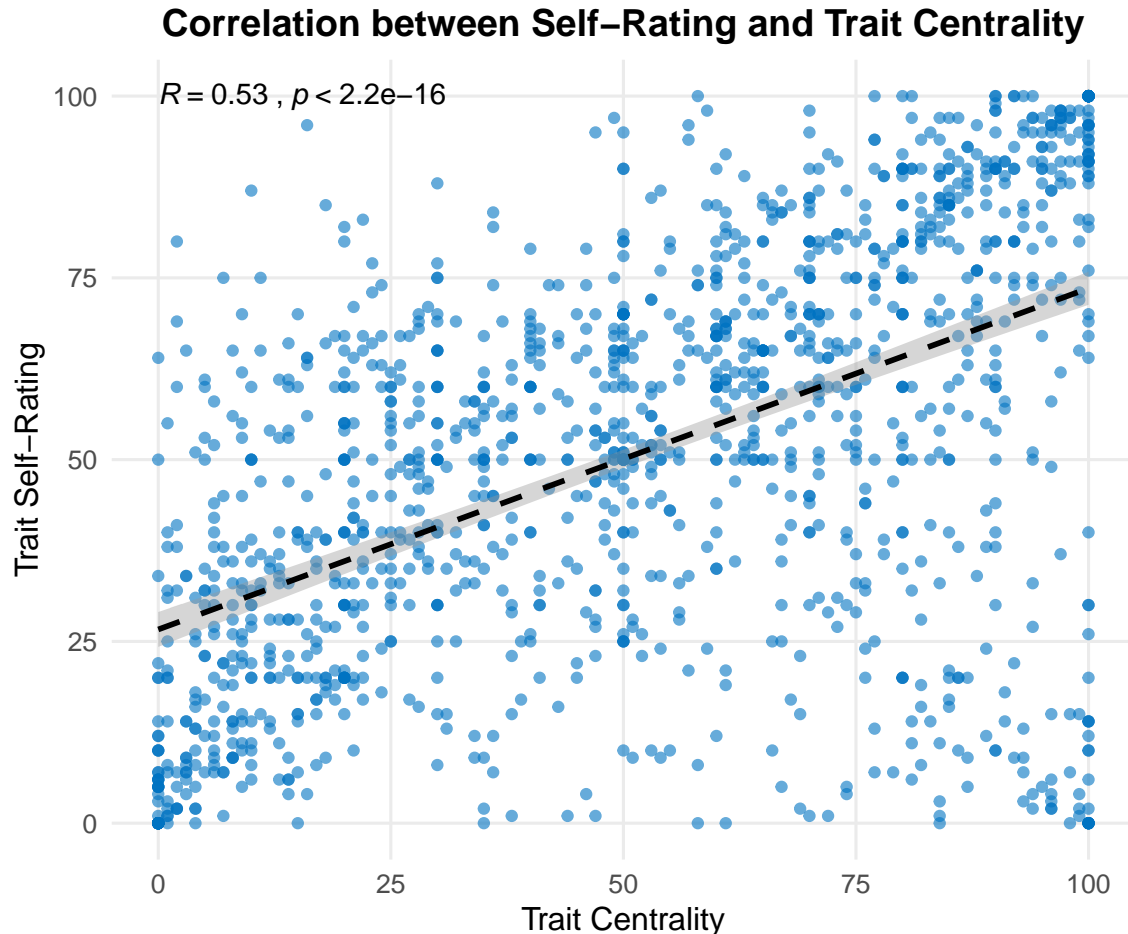

Figure 3: Correlation between self-rating and trait centrality

To help the interpretation of the centrality model, we person-mean centered centrality

Examining the main model after adding trait centrality (centered) reveals that that the significant quadratic effect of Feedback and the interaction of Valence with the linear term of Feedback were not removed. Additionally, Centrality has a significant main effect and a significant interaction with the linear term of Feedback. Specifically participants displayed a greater desire to avoid questionnaires that regarded traits that are less central. important to note- the effects of centrality and its interaction were not consistent across studies.

Table 23: Fixed Effects from Centrality Model with Quadratic Feedback Term

| term                                                  | $\beta$ | SE    | t value | df       | p.value | conf.low | conf.high |
|-------------------------------------------------------|---------|-------|---------|----------|---------|----------|-----------|
| Intercept                                             | -10.552 | 2.175 | -4.852  | 131.722  | 0.000   | -14.854  | -6.250    |
| Feedback (Linear)                                     | -1.235  | 1.065 | -1.160  | 69.065   | 0.250   | -3.358   | 0.889     |
| Valence                                               | 1.440   | 1.500 | 0.960   | 421.596  | 0.338   | -1.508   | 4.388     |
| Centrality (Centered)                                 | 0.143   | 0.046 | 3.107   | 1145.952 | 0.002   | 0.053    | 0.233     |
| Feedback (Quadratic)                                  | 17.990  | 1.768 | 10.175  | 1297.102 | 0.000   | 14.522   | 21.459    |
| Feedback (L) $\times$ Valence                         | 3.761   | 1.551 | 2.426   | 61.020   | 0.018   | 0.661    | 6.862     |
| Feedback (L) $\times$ Centrality (C)                  | -0.080  | 0.036 | -2.206  | 916.841  | 0.028   | -0.151   | -0.009    |
| Valence $\times$ Centrality (C)                       | 0.012   | 0.047 | 0.256   | 1124.301 | 0.798   | -0.080   | 0.104     |
| Feedback (Q) $\times$ Valence                         | -3.314  | 1.765 | -1.878  | 1292.357 | 0.061   | -6.776   | 0.149     |
| Feedback (Q) $\times$ Centrality (C)                  | -0.068  | 0.058 | -1.177  | 1332.489 | 0.240   | -0.182   | 0.046     |
| Feedback (L) $\times$ Valence $\times$ Centrality (C) | 0.005   | 0.035 | 0.133   | 918.047  | 0.894   | -0.064   | 0.074     |
| Feedback (Q) $\times$ Valence $\times$ Centrality (C) | -0.042  | 0.058 | -0.711  | 1341.524 | 0.477   | -0.156   | 0.073     |

Table 24: Estimated Marginal Means: Importance

| Centrality   | emmean  | SE    | df      | lower.CL | upper.CL |
|--------------|---------|-------|---------|----------|----------|
| Low (-1 SD)  | -14.878 | 2.673 | 257.925 | -20.141  | -9.615   |
| Mean         | -10.552 | 2.179 | 129.080 | -14.863  | -6.241   |
| High (+1 SD) | -6.226  | 2.518 | 213.795 | -11.189  | -1.264   |

Table 25: Estimated Marginal Means: Feedback × Valence × Importance

| feedback         | valence        | Centrality   | emmean  | SE    | df      | lower.CL | upper.CL |
|------------------|----------------|--------------|---------|-------|---------|----------|----------|
| Lower Violation  | Negative Trait | Low (−1 SD)  | -0.605  | 3.634 | 101.967 | -7.814   | 6.603    |
| Verification     | Negative Trait | Low (−1 SD)  | -13.802 | 2.734 | 146.938 | -19.205  | -8.399   |
| Higher Violation | Negative Trait | Low (−1 SD)  | 9.015   | 2.886 | 61.384  | 3.244    | 14.786   |
| Lower Violation  | Positive Trait | Low (−1 SD)  | 8.593   | 4.558 | 213.735 | -0.392   | 17.578   |
| Verification     | Positive Trait | Low (−1 SD)  | -15.954 | 4.040 | 567.933 | -23.889  | -8.018   |
| Higher Violation | Positive Trait | Low (−1 SD)  | 3.733   | 3.192 | 92.857  | -2.606   | 10.073   |
| Lower Violation  | Negative Trait | Mean         | 3.038   | 3.059 | 56.974  | -3.089   | 9.164    |
| Verification     | Negative Trait | Mean         | -9.112  | 2.716 | 144.239 | -14.480  | -3.744   |
| Higher Violation | Negative Trait | Mean         | 8.092   | 2.960 | 68.778  | 2.185    | 13.998   |
| Lower Violation  | Positive Trait | Mean         | 14.308  | 3.076 | 78.825  | 8.186    | 20.430   |
| Verification     | Positive Trait | Mean         | -11.992 | 2.581 | 206.947 | -17.080  | -6.904   |
| Higher Violation | Positive Trait | Mean         | 4.316   | 2.358 | 43.189  | -0.440   | 9.072    |
| Lower Violation  | Negative Trait | High (+1 SD) | 6.681   | 4.078 | 108.789 | -1.401   | 14.763   |
| Verification     | Negative Trait | High (+1 SD) | -4.422  | 3.833 | 397.982 | -11.958  | 3.113    |
| Higher Violation | Negative Trait | High (+1 SD) | 7.168   | 4.194 | 195.474 | -1.103   | 15.439   |
| Lower Violation  | Positive Trait | High (+1 SD) | 20.023  | 2.914 | 61.843  | 14.199   | 25.848   |
| Verification     | Positive Trait | High (+1 SD) | -8.030  | 2.419 | 169.411 | -12.806  | -3.255   |
| Higher Violation | Positive Trait | High (+1 SD) | 4.899   | 3.280 | 104.390 | -1.604   | 11.402   |

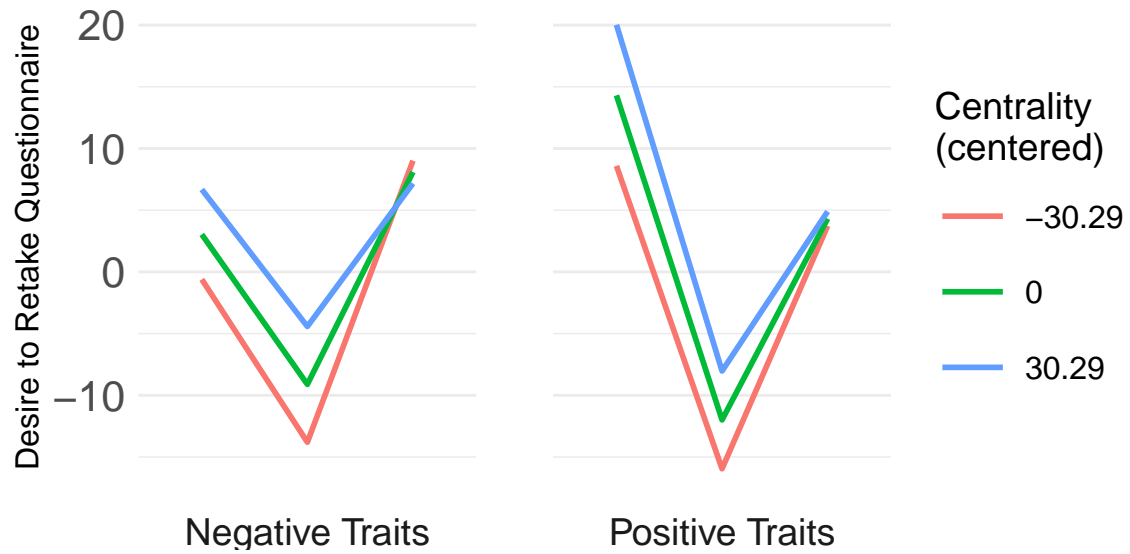

Figure 4: Interaction between Feedback, Valence, and Trait Centrality on desire to retake questionnaire. The plot displays predicted data according to `ggeffects::ggpredict`, not original data.
