# Supplementary material for: Robust preferences for information that violates one’s self-perception: the case of non-human sources
Source: Research Square preprint supplement (doi:10.21203/rs.3.rs-7511591/v1), 2025-10-15
Supplement: Supplementary file 4 [file e1384e1089540716433765a3.pdf]

# Supplementary 6 - Pilot Study

## Table of Contents

|     |                                           |    |
|-----|-------------------------------------------|----|
| 1   | Background                                | 2  |
| 2   | Participant Exclusion                     | 2  |
| 3   | Stimuli - Traits and Trait Questionnaires | 3  |
| 4   | Analyses                                  | 7  |
| 4.1 | Main Model Analysis . . . . .             | 7  |
| 4.2 | Self-Esteem Mediation . . . . .           | 9  |
| 4.3 | Trait Centrality Model . . . . .          | 12 |

# 1 Background

This study was the first pilot of this paradigm (before Study 1 & Study 2 that are reported in the manuscript). Its purpose was to determine whether the paradigm and the measurements are feasible, to estimate an effect size, and to find the appropriate size of violation to use in such a paradigm.

As a very exploratory study, we decided it was not yet justified to provide participants with negative evaluation on themselves. For this reason the Pilot Study included only neutral traits and feedbacks were either verifying or positively violating. To test the effect of different sizes of violation, feedback was either mildly violating or highly violating.

Besides the base paradigm, participants in the Pilot Study also answered the Rosenberg Self-Esteem Scale (Rosenberg, 1965).

# 2 Participant Exclusion

A total of  $N = 103$  participants began the first session of the Pilot Study.

51 participants did not finish the study and were excluded from data analysis according to pre-registered criteria:

- Twelve participants in session 1 provided self-ratings that were unsuitable for session 2 (elaborated below).
- Fifteen participants failed the comprehension checks either at the beginning of Session 1 or at the beginning of Session 2.
- Twelve failed attention checks either on Session 1 or on Session 2.
- One did not finish Session 1.
- Six did not return to session 2 at the appropriate time or didn't finish it.
- Two participants were excluded for not understanding the instructions as evidenced by their choices.
- Three participants indicated they had ADHD and therefore did not meet inclusion criteria and were excluded from the study before they began answering.

The final analysis included N = 52 participants.

#### Unsuitable self-ratings-

To be eligible for the 2nd session, participants needed to provide self-rating that allow us to create feedbacks for all 3 conditions-

- Verification - a feedback similar to the self-rating (self-rating + rand(-5:5)).
- Small Positive Violation - a feedback mildly higher than the self-rating (self-rating + 15 + rand(-5:5)).
- Big Positive Violation - a feedback much higher than the self-rating (self-rating + 30 + rand(-5:5)).

To do so, an eligible participant was required to have:

- no more than 8 traits self-rated higher than 85 &
- no more than 12 traits self-rated lower than 70.

### **3 Stimuli - Traits and Trait Questionnaires**

Traits were taken from the paper E-millim (Armony-Sivan et al., 2013), in which participants received random Hebrew words and rated them either on valence, i.e., how positive or negative the word is, or on arousal. Both scales ranged from 1-9. For the Pilot Study we chose only neutral traits, as the first stage each participant rated themselves on 20 traits in a random order (Table 1). "N valence" and "N Arousal" refer to the number of participants who rated the word on each scale. The trait questionnaires were originally written in Hebrew, for the supplementary materials Table 2 displays a rough translation to English by ChatGPT. "Original Length" refers to the number of characters (including spaces) in all 3 original Hebrew questionnaires, which we controlled for. Question order was randomized for each trait for each participant.

Table 1: Traits used in the Pilot Study as Stimuli (data from E-millim)

| Trait English | Trait Hebrew | N valence | Mean valence | SD valence | N arousal | Mean arousal | SD arousal |
|---------------|--------------|-----------|--------------|------------|-----------|--------------|------------|
| analytical    | אנליטיות     | 32        | 5.84         | 1.62       | 33        | 4.45         | 2.12       |
| shy           | ביישנות      | 31        | 4.84         | 1.88       | 33        | 5.24         | 2.53       |
| worrisome     | דאגנות       | 31        | 4.23         | 1.93       | 33        | 6.12         | 1.95       |
| dramatic      | דרמטיות      | 32        | 4.13         | 1.88       | 33        | 5.94         | 2.00       |
| opinionated   | דעתנות       | 27        | 5.56         | 1.95       | 24        | 6.63         | 2.12       |
| indulgent     | וותרנות      | 31        | 4.48         | 2.40       | 33        | 5.00         | 2.02       |
| childish      | ילדותיות     | 27        | 4.22         | 2.17       | 25        | 4.92         | 2.89       |
| Conscientious | מצפוניות     | 33        | 5.91         | 2.16       | 33        | 6.09         | 2.22       |
| authoritarian | סמכותיות     | 30        | 6.33         | 1.66       | 33        | 6.12         | 2.17       |
| adaptive      | סתגלנות      | 32        | 6.25         | 1.38       | 33        | 5.00         | 2.35       |
| consistent    | עקביות       | 27        | 6.67         | 1.34       | 25        | 5.48         | 2.25       |
| stubborn      | עקשנות       | 32        | 4.31         | 2.02       | 32        | 6.13         | 2.04       |
| simple        | פשטות        | 22        | 6.32         | 1.84       | 23        | 5.17         | 2.61       |
| cool          | קור-רוח      | 32        | 6.31         | 1.79       | 33        | 4.76         | 2.61       |
| tough         | קשיחות       | 33        | 4.39         | 2.17       | 32        | 5.84         | 1.72       |
| spiritual     | רוחניות      | 22        | 6.48         | 1.89       | 23        | 5.70         | 3.14       |
| compassionate | רחמנות       | 33        | 5.82         | 2.23       | 33        | 5.09         | 2.39       |
| rational      | רציונאליות   | 27        | 6.81         | 1.30       | 25        | 5.24         | 2.37       |
| serious       | רצינות       | 32        | 6.34         | 1.54       | 33        | 5.52         | 2.18       |
| naïve         | תמימות       | 31        | 6.29         | 1.52       | 33        | 4.67         | 2.36       |

Table 2: Trait Questionnaires used in the Pilot Study as Stimuli

| Trait English | Trait Hebrew | Question 1                                        | Question 2                                                        | Question 3 (reversed)                                              | Original Length |
|---------------|--------------|---------------------------------------------------|-------------------------------------------------------------------|--------------------------------------------------------------------|-----------------|
| analytical    | אנליטיות     | I find STEM subjects easy                         | I find it easy to understand a logical argument in a long article | I struggle to solve arithmetic problems in my head                 | 95              |
| shy           | ביישנות      | I find it hard to speak in front of an audience   | I feel uncomfortable approaching people I haven't met before      | I find it easy to share personal details about my life with others | 97              |
| worrisome     | דאגנות       | I tend to have many worries in my daily life      | I often worry about my loved ones                                 | I find risky activities enjoyable                                  | 89              |
| dramatic      | דרמטיות      | I often express emotions in an exaggerated manner | I tend to get excited by trivial events                           | I tend to describe events without exaggeration                     | 97              |
| opinionated   | דעתנות       | I frequently express my opinion on various topics | I tend to intervene in other people's conversations               | I find it hard to express a conflicting opinion to others          | 99              |
| indulgent     | וותרנות      | I often abandon challenging tasks                 | I tend to be flexible with others' decisions                      | I tend to insist and stand my ground                               | 93              |
| childish      | ילדותיות     | I feel bad when I make mistakes that hurt others  | I find it hard to witness injustice in the world                  | I find it easy to stay indifferent in the face of injustice        | 83              |
| Conscientious | מצפוניות     | I feel bad when I make mistakes that hurt others  | I find it hard to witness injustice in the world                  | I find it easy to stay indifferent in the face of injustice        | 96              |
| authoritarian | סמכותיות     | I feel comfortable giving instructions to others  | I find it easy to lead and manage a group                         | I find it difficult to make decisions for others in a group        | 93              |

|               |            |                                                   |                                                                      |                                                   |     |
|---------------|------------|---------------------------------------------------|----------------------------------------------------------------------|---------------------------------------------------|-----|
| adaptive      | סתגלנות    | I find it easy to handle new situations           | I find it easy to manage without a fixed schedule                    | I find it hard to cope with last-minute changes   | 97  |
| consistent    | עקביות     | I tend to repeat similar behavior patterns        | I try to maintain a consistent daily routine                         | I frequently change my views and opinions         | 98  |
| stubborn      | עקשנות     | I find it hard to reach compromises with others   | It's important to me to do things my own way                         | I can change my mind after a little persuasion    | 90  |
| simple        | פשטות      | I tend to be satisfied with little                | I tend to enjoy the simple things in life                            | I often buy expensive items                       | 92  |
| cool          | קור-רוח    | I find it easy to handle stressful situations     | I tend to respond in a quick and matter-of-fact way                  | I find it hard to relax without calming exercises | 94  |
| tough         | קשיחות     | Insults don't affect me emotionally               | I address others assertively                                         | I'm comfortable expressing emotions to others     | 81  |
| spiritual     | רוחניות    | I believe in a higher power                       | I believe I'm part of something greater                              | I struggle to believe in things I can't see       | 94  |
| compassionate | רחמנות     | I often express compassion for others' suffering  | I often help people in distress                                      | I tend to judge others harshly for their mistakes | 100 |
| rational      | רציונאליות | I find it hard to perform a task that lacks logic | It's important for me to list pros and cons before making a decision | My actions are driven by emotions                 | 95  |
| serious       | רצינות     | It's important for me to keep my commitments      | I find it hard to speak without prior thinking                       | I often laugh at myself                           | 86  |
| naïve         | תמימות     | People find it easy to deceive me                 | I believe the world is a good place                                  | I find it hard to believe what others say         | 92  |

*Note:*

Roughly translated from Hebrew by ChatGPT. Original length refers to N symbols in Hebrew.

## 4 Analyses

### 4.1 Main Model Analysis

To model this data we used a mixed linear model with verification condition (verification, mild violation, high violation; dummy coded) predicting the desire to retake each questionnaire. The model also included a random intercept and slope for participants. As evident by the results, the size of violation the feedback caused affected the desire to retake questionnaire compared to questionnaires providing verifying feedback (Table 3 & 5). Specifically, participants forwent money to avoid retaking verifying questionnaire, did not care whether to retake or avoid mildly violating questionnaires, and forwent money to retake highly violating questionnaires (Table 4).

Table 3: Fixed Effects from the Main Model

| term                            | $\beta$ | SE    | t value | df     | p.value | conf.low | conf.high |
|---------------------------------|---------|-------|---------|--------|---------|----------|-----------|
| Intercept                       | -13.777 | 3.936 | -3.500  | 48.355 | 0.001   | -21.689  | -5.864    |
| Mild Violation vs. Verification | 11.751  | 5.121 | 2.295   | 50.591 | 0.026   | 1.468    | 22.033    |
| Mild Violation vs. Verification | 24.588  | 6.603 | 3.724   | 50.377 | 0.000   | 11.328   | 37.849    |

Table 4: Estimated Marginal Means by Verification Condition

| verification_condition | emmean  | SE    | df     | lower.CL | upper.CL |
|------------------------|---------|-------|--------|----------|----------|
| Verification           | -13.777 | 3.939 | 50.582 | -21.686  | -5.868   |
| Mild Violation         | -2.026  | 4.220 | 49.963 | -10.503  | 6.451    |
| High Violation         | 10.812  | 4.939 | 50.410 | 0.893    | 20.730   |

Table 5: Effect Size (Cohen's d) for Violation vs. Verification

| contrast                        | Cohen's d | SE    | df     | lower.CL | upper.CL |
|---------------------------------|-----------|-------|--------|----------|----------|
| High Violation vs. Verification | 0.732     | 0.197 | 50.410 | 0.337    | 1.128    |
| High Violation vs. Verification | 0.350     | 0.153 | 49.963 | 0.043    | 0.657    |

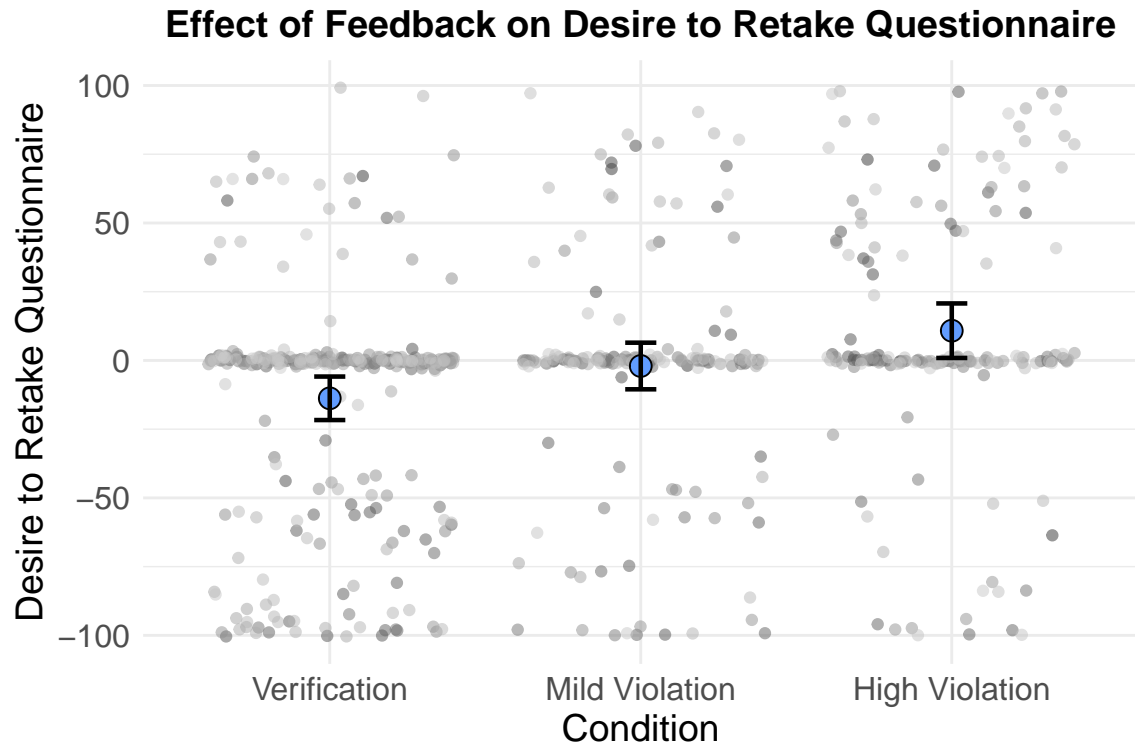

Figure 1: Gray points represent the responses at the participants' level, Blue point and error bars are means and confidence intervals derived from the Main Model



## 4.2 Self-Esteem Mediation

Self-esteem was measured by the Rosenberg Self-Esteem Scale. Self-esteem was coded into 3 groups as recommended in the literature (Echeburua, 1995; García et.al, 2019; Rosenberg, 1965)

As we did not have enough participants in the Low Self-Esteem group, the results should be analyzed carefully. Adding Self-Esteem to the model shrunk the effect of violation vs. verification, such that mild violation was no longer significantly different than verification, and high violation remained significantly different but with a smaller effect size. Self-esteem did not have a significant effect on the desire to retake questionnaires, nor did it have a significant interaction effect.

Table 6: RSE Group Counts

| Group              | Count |
|--------------------|-------|
| Low RSE (<26)      | 8     |
| Medium RSE (26–29) | 17    |
| High RSE (>29)     | 27    |

Table 7: Descriptive Statistics

| variable  | n  | min | max | median | q1 | q3 | iqr | mad   | mean   | sd    | se    | ci    |
|-----------|----|-----|-----|--------|----|----|-----|-------|--------|-------|-------|-------|
| rse.score | 52 | 20  | 39  | 30     | 27 | 34 | 7   | 4.448 | 30.308 | 4.841 | 0.671 | 1.348 |

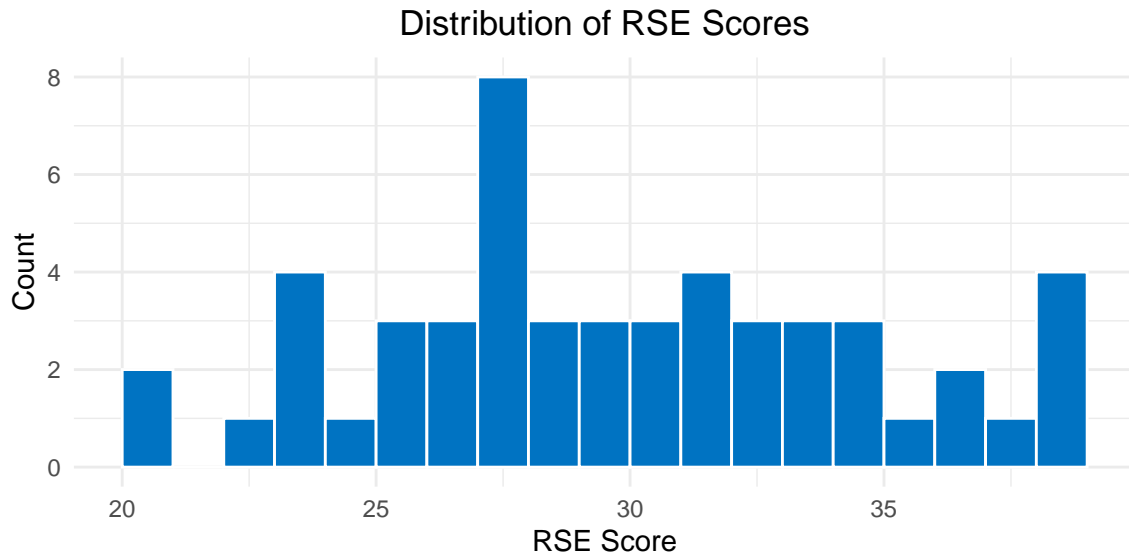

Table 8: Fixed Effects from RSE Model (Verification Condition  $\times$  RSE Group)

| term                                       | $\beta$ | SE     | t value | df     | p.value | conf.low | conf.high |
|--------------------------------------------|---------|--------|---------|--------|---------|----------|-----------|
| Intercept                                  | -14.433 | 4.428  | -3.259  | 46.980 | 0.002   | -23.341  | -5.524    |
| Mild Violation vs. Verification            | 11.445  | 5.891  | 1.943   | 48.071 | 0.058   | -0.400   | 23.289    |
| High Violation vs. Verification            | 27.103  | 7.509  | 3.609   | 47.777 | 0.001   | 12.003   | 42.203    |
| RSE (Medium vs. Low)                       | -6.616  | 7.322  | -0.904  | 48.279 | 0.371   | -21.336  | 8.104     |
| RSE (High vs. Medium)                      | 9.591   | 5.887  | 1.629   | 45.300 | 0.110   | -2.264   | 21.445    |
| Mild Violation $\times$ RSE (Med vs. Low)  | -3.113  | 9.648  | -0.323  | 47.535 | 0.748   | -22.517  | 16.291    |
| High Violation $\times$ RSE (Med vs. Low)  | 9.343   | 12.312 | 0.759   | 47.454 | 0.452   | -15.420  | 34.105    |
| Mild Violation $\times$ RSE (High vs. Med) | 2.690   | 7.934  | 0.339   | 48.838 | 0.736   | -13.256  | 18.636    |
| High Violation $\times$ RSE (High vs. Med) | -5.031  | 10.097 | -0.498  | 48.243 | 0.621   | -25.330  | 15.268    |

Table 9: Estimated Marginal Means: Condition  $\times$  RSE Group

| verification_condition | rse_group | emmean  | SE     | df     | lower.CL | upper.CL |
|------------------------|-----------|---------|--------|--------|----------|----------|
| Verification           | Low       | -21.049 | 10.106 | 52.298 | -41.324  | -0.773   |
| Mild Violation         | Low       | -12.717 | 10.395 | 43.605 | -33.672  | 8.238    |
| High Violation         | Low       | 15.397  | 12.356 | 44.981 | -9.489   | 40.284   |
| Verification           | Medium    | -4.842  | 6.722  | 46.141 | -18.373  | 8.688    |
| Mild Violation         | Medium    | 9.292   | 7.487  | 51.902 | -5.732   | 24.317   |
| High Violation         | Medium    | 17.229  | 8.785  | 51.401 | -0.404   | 34.863   |
| Verification           | High      | -17.408 | 5.422  | 49.192 | -28.302  | -6.513   |
| Mild Violation         | High      | -5.540  | 5.784  | 46.961 | -17.176  | 6.097    |
| High Violation         | High      | 5.384   | 6.836  | 47.676 | -8.364   | 19.131   |

Table 10: Estimated Marginal Means: RSE Group

| rse_group | emmean | SE    | df     | lower.CL | upper.CL |
|-----------|--------|-------|--------|----------|----------|
| Low       | -6.123 | 7.347 | 47.106 | -20.901  | 8.656    |
| Medium    | 7.227  | 5.127 | 50.321 | -3.070   | 17.523   |
| High      | -5.854 | 4.030 | 48.476 | -13.955  | 2.246    |

## Desire to Retake Questionnaire by Self-Esteem

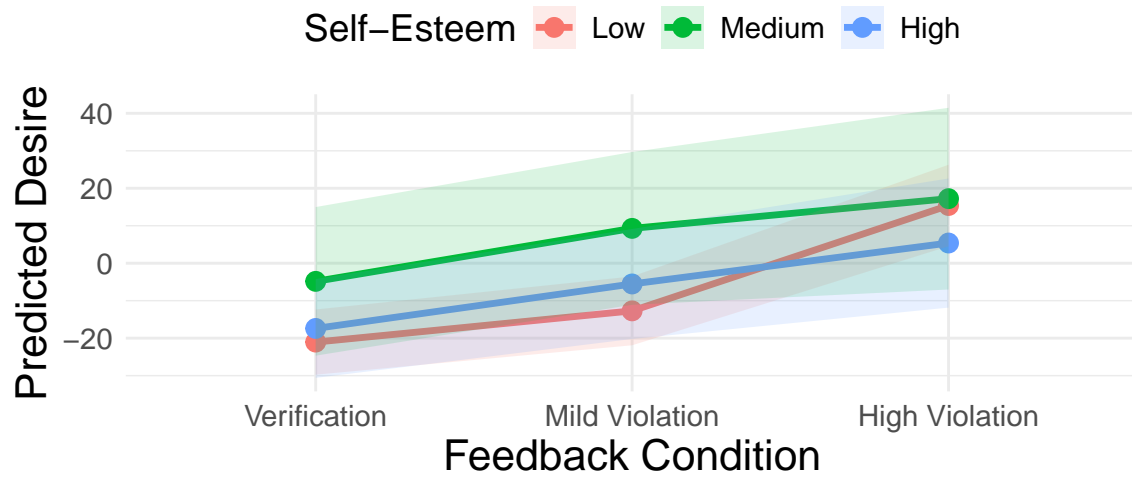

Figure 2: Interaction between Feedback, RSE on desire to retake questionnaire. The plot displays predicted data according to `modelbased::estimate_relation`, and not original data.

### 4.3 Trait Centrality Model

For each trait, participants rated how central that trait is to them. Centrality was significantly correlated with trait self-rating

Pearson correlation:  $r(622) = 0.43$ ,  $t = 12.03$ ,  $p < .001$ .

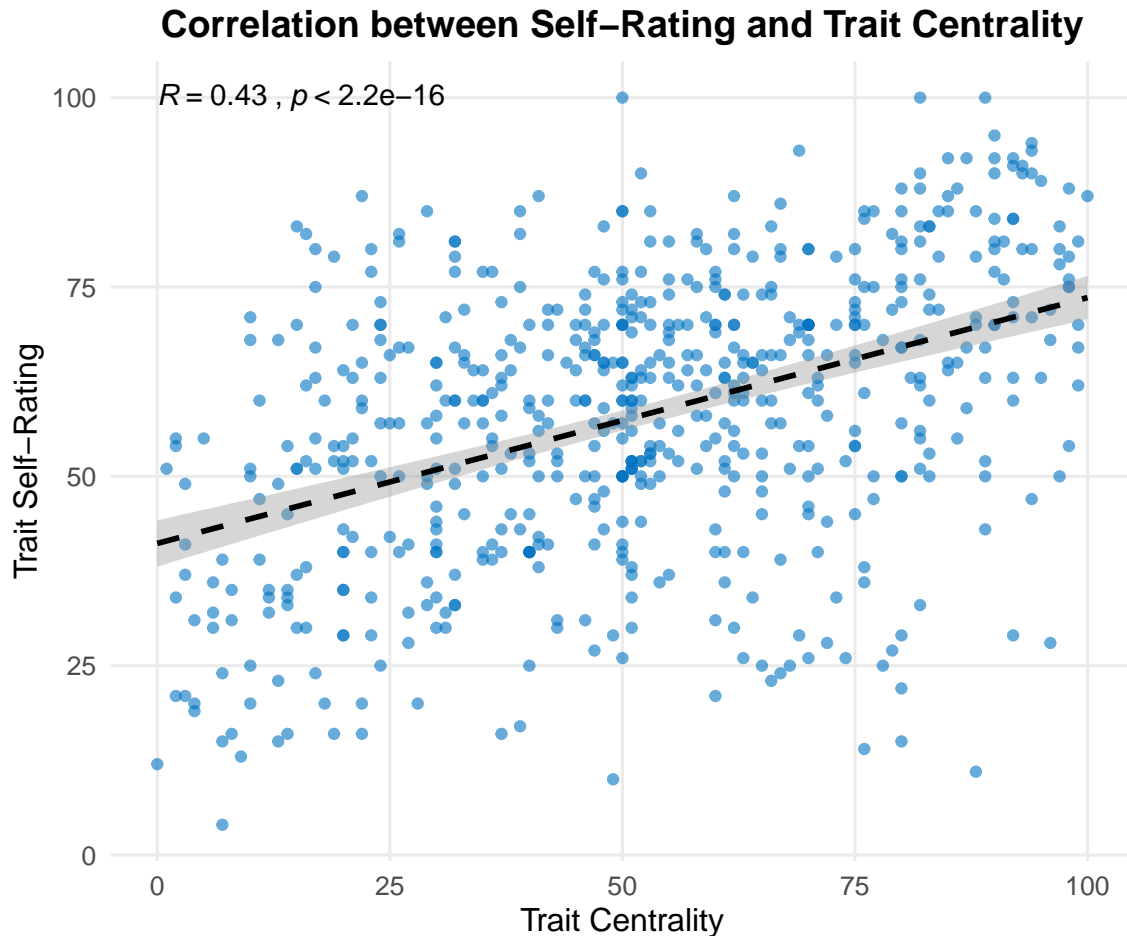

Figure 3: Correlation between self-rating and trait centrality

To help the interpretation of the centrality model, we mean-person centered centrality.

Adding trait centrality (centered) to the main model did not impact the significance of the effects of violations versus verification, but reduced their effect sizes. Neither the trait centrality nor its interaction with the feedback had a significant or consistent (across studies) effect on the desire to retake questionnaires.

Table 11: Fixed Effects from Centrality Model

| term                               | $\beta$ | SE    | t value | df      | p.value | conf.low | conf.high |
|------------------------------------|---------|-------|---------|---------|---------|----------|-----------|
| Intercept                          | -13.646 | 3.939 | -3.465  | 48.689  | 0.001   | -21.562  | -5.730    |
| verification_condition2            | 11.593  | 5.145 | 2.253   | 50.677  | 0.029   | 1.261    | 21.924    |
| verification_condition3            | 24.278  | 6.645 | 3.653   | 51.563  | 0.001   | 10.941   | 37.615    |
| Centrality                         | -0.044  | 0.090 | -0.491  | 496.436 | 0.624   | -0.220   | 0.132     |
| verification_condition2:centrality | 0.097   | 0.159 | 0.606   | 517.453 | 0.545   | -0.216   | 0.410     |
| verification_condition3:centrality | 0.014   | 0.152 | 0.093   | 522.439 | 0.926   | -0.285   | 0.313     |

Table 12: Effect of Centrality on Desire to Retake Questionnaire by Feedback Condition

| verification_condition | centrality.trend | SE    | df      | lower.CL | upper.CL |
|------------------------|------------------|-------|---------|----------|----------|
| Verification           | -0.044           | 0.090 | 497.136 | -0.220   | 0.132    |
| Mild Violation         | 0.053            | 0.132 | 473.031 | -0.207   | 0.312    |
| High Violation         | -0.030           | 0.125 | 518.042 | -0.274   | 0.215    |

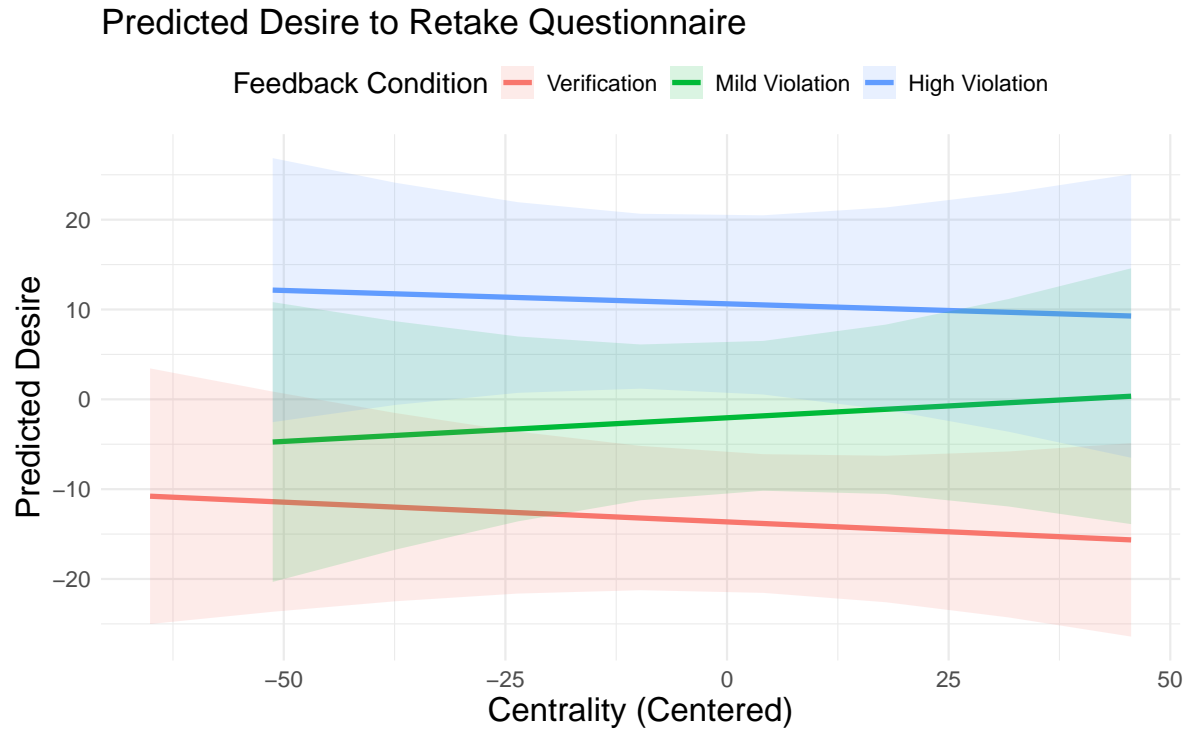

Figure 4: Interaction between Feedback and Trait Centrality on desire to retake questionnaire. The plot displays predicted data according to `modelbased::estimate_relation`, not original data.
