# Supplementary material for: Robust preferences for information that violates one’s self-perception: the case of non-human sources
Source: Research Square preprint supplement (doi:10.21203/rs.3.rs-7511591/v1), 2025-10-15
Supplement: Supplementary file 5 [file f29426af79d36563bb45ac61.pdf]

# Supplementary 1 - Study 1

## Table of Contents

|          |                                                    |          |
|----------|----------------------------------------------------|----------|
| <b>1</b> | <b>Participant Exclusion</b>                       | <b>2</b> |
| <b>2</b> | <b>Stimuli - Traits and Trait Questionnaires</b>   | <b>3</b> |
| <b>3</b> | <b>Additional Analyses Unreported in the Paper</b> | <b>8</b> |
| 3.1      | Self-Esteem Mediation . . . . .                    | 8        |
| 3.2      | Patient Health Questionnaire - 2 . . . . .         | 11       |
| 3.3      | Trait Centrality Model . . . . .                   | 12       |

# 1 Participant Exclusion

A total of N = 91 participants began the first session of Study 1.

33 participants did not finish the study and were excluded according to pre-registered criteria:

- Fourteen provided in session 1 self-ratings that were unsuitable for session 2 (elaborated below).
- Nine failed comprehension checks.
- Six failed attention checks.
- Two did not return to session 2.
- Two did not understand the instructions as evident by their performance.

The final analysis included N = 58 participants.

## Unsuitable self-ratings-

To be eligible for the 2nd session, participants needed to provide self-rating that allow us to create feedbacks for all 4 conditions-

- Positive Verification - a feedback similar to the self-rating ( $\text{self-rating} + \text{rand}(-5:5)$ ) of a trait self-rated higher than 75.
- Positive Violation - a feedback higher than the self-rating ( $\text{self-rating} + 30 + \text{rand}(-5:5)$ ).
- Non-Positive Verification - a feedback similar to the self-rating ( $\text{self-rating} + \text{rand}(-5:5)$ ) of a trait self-rated between 35-65.
- Negative Violation - a feedback lower than the self-rating ( $\text{self-rating} - 30 + \text{rand}(-5:5)$ ).

To do so, an eligible participant needed to have:

- at least 4 traits self-rated higher than 75 &

- at least 4 (different) traits self-rated lower than 70 &
- at least 4 (different) traits self-rated between 35 and 65 &
- at least 4 (different) traits self-rated higher than 30

## **2 Stimuli - Traits and Trait Questionnaires**

Traits were taken from the paper E-millim (Armony-Sivan et al., 2013), in which participants received random Hebrew words and rated them either on valence, i.e., how positive or negative the word is, or on arousal. Both scales ranged from 1-9.

The chosen traits for Study 1, positive Hebrew traits, and their rating are presented in Table 1 (data from the E-millim paper). “N valence” and “N Arousal” refer to the number of participants who rated the word on each scale. The trait questionnaires were originally written in Hebrew, for the supplementary materials Table 2 displays a rough translation to English by ChatGPT. “Original Length” refers to the number of characters (including spaces) in all 3 original Hebrew questionnaires, which we controlled for. Question order was randomized for each trait for each participant.

Table 1: Traits used in Study 1 as Stimuli (data from E-millim)

| Trait English | Trait Hebrew | N valence | Mean valence | SD valence | N arousal | Mean arousal | SD arousal |
|---------------|--------------|-----------|--------------|------------|-----------|--------------|------------|
| brave         | אומץ         | 27        | 7.890000     | 1.000000   | 25        | 6.080000     | 2.320000   |
| responsible   | אחריות       | 27        | 7.040000     | 1.380000   | 25        | 7.040000     | 2.210000   |
| empathic      | אמפטיה       | 27        | 7.300000     | 0.920000   | 25        | 5.840000     | 2.430000   |
| mature        | בגרות        | 32        | 6.690000     | 1.640000   | 33        | 5.820000     | 1.890000   |
| decisive      | החלטיות      | 33        | 7.000000     | 1.340000   | 33        | 5.670000     | 1.920000   |
| persevering   | התמדה        | 32        | 7.410000     | 1.640000   | 33        | 5.850000     | 2.140000   |
| warm          | חמימות       | 27        | 7.810000     | 0.940000   | 25        | 6.480000     | 2.120000   |
| diligent      | חריצות       | 27        | 7.810000     | 1.150000   | 25        | 5.960000     | 2.550000   |
| honest        | יושרה        | 32        | 7.780000     | 1.090000   | 33        | 5.820000     | 2.590000   |
| stable        | יציבות       | 27        | 7.410000     | 1.200000   | 24        | 5.790000     | 2.660000   |
| creative      | צירתיות      | 21        | 7.810000     | 1.170000   | 23        | 7.000000     | 1.830000   |
| charismatic   | כריזמה       | 32        | 7.560000     | 1.460000   | 32        | 6.560000     | 2.370000   |
| moral         | מוסריות      | 32        | 7.940000     | 1.060000   | 32        | 6.310000     | 2.630000   |
| generous      | נדיבות       | 27        | 8.000000     | 0.940000   | 24        | 5.920000     | 2.490000   |
| loyal         | נאמנות       | 33        | 8.000000     | 1.230000   | 33        | 6.270000     | 2.610000   |
| polite        | נימוס        | 31        | 7.100000     | 1.390000   | 33        | 5.670000     | 2.430000   |
| patient       | סבלנות       | 27        | 7.370000     | 1.110000   | 25        | 5.480000     | 2.740000   |
| forgiving     | סלחנות       | 31        | 6.840000     | 1.340000   | 33        | 5.330000     | 2.380000   |
| spontaneous   | פונטניות     | 32        | 7.280000     | 1.210000   | 32        | 5.750000     | 2.570000   |
| gentle        | עדינות       | 33        | 7.060000     | 1.280000   | 31        | 4.680000     | 2.280000   |
| joyful        | עליזות       | 32        | 7.340000     | 1.270000   | 33        | 5.700000     | 2.540000   |
| consistent    | עקביות       | 27        | 6.670000     | 1.340000   | 25        | 5.480000     | 2.250000   |
| initiative    | יוזמה        | 31        | 7.260000     | 1.030000   | 32        | 6.880000     | 1.570000   |
| open          | פתיחות       | 31        | 6.940000     | 0.970000   | 32        | 6.030000     | 1.940000   |
| humble        | צניעות       | 33        | 7.270000     | 1.440000   | 33        | 4.910000     | 2.070000   |
| calm          | רוגע         | 36        | 7.777778     | 1.532712   | 34        | 4.705882     | 2.769197   |
| spiritual     | רוחניות      | 22        | 6.480000     | 1.890000   | 23        | 5.700000     | 3.140000   |
| romantic      | רומנטיות     | 33        | 7.790000     | 1.230000   | 33        | 6.360000     | 2.160000   |
| rational      | יונאליות     | 27        | 6.810000     | 1.300000   | 25        | 5.240000     | 2.370000   |
| serious       | רצינות       | 32        | 6.340000     | 1.540000   | 33        | 5.520000     | 2.180000   |

Table 2: Trait Questionnaires used in Study 1 as Stimuli

| Trait English | Trait Hebrew | Question 1                                                 | Question 2                                                      | Question 3 (reversed)                                            | Original Length |
|---------------|--------------|------------------------------------------------------------|-----------------------------------------------------------------|------------------------------------------------------------------|-----------------|
| brave         | אומץ         | I tend to engage in risky behaviors                        | It's easy for me to function properly under danger              | I try to avoid situations where I might get hurt                 | 95              |
| responsible   | אחריות       | I will make sure to perform well the tasks entrusted to me | I tend to double-check my actions several times                 | I try to shake off mistakes I've made                            | 98              |
| empathic      | אמפטיה       | I often express compassion toward the suffering of others  | It's easy for me to recognize others' emotional states          | In my opinion, another person's suffering is their own business  | 96              |
| mature        | בגרות        | I have a good ability to delay gratification               | My life experience guides the way I conduct myself              | I find it difficult to embrace a complex worldview               | 95              |
| decisive      | החלטיות      | I tend to stick to decisions I've made                     | I find it easy to make decisions quickly                        | I find it hard to choose between two similar products            | 92              |
| persevering   | התמדה        | It's important to me to finish what I started              | I don't tend to give up in the face of difficulty               | I tend to switch between tasks to maintain interest              | 97              |
| warm          | חמימות       | When I see a crying child, I want to hug them              | My loved ones are aware of my feelings toward them              | I tend to avoid closeness with people                            | 96              |
| diligent      | חריצות       | I always try to start working energetically                | It's easy for me to settle into tasks even when they're complex | I find it hard to start the day in the morning                   | 97              |
| initiative    | יוזמה        | It's easy for me to get others on board with my ideas      | I tend to take on more than is required                         | I prefer to work as part of a task that has already been defined | 95              |
| honest        | יושרה        | It's important for me to admit mistakes I've made          | I will follow the rules even when no one is watching            | I'll cut corners as long as no one gets hurt                     | 96              |

|             |           |                                                              |                                                       |                                                             |    |
|-------------|-----------|--------------------------------------------------------------|-------------------------------------------------------|-------------------------------------------------------------|----|
| stable      | יציבות    | I have frequent mood swings                                  | Many things can easily upset me                       | I will behave the same way in different situations          | 94 |
| creative    | יצירתיות  | It's easy for me to think outside the box                    | I often interpret information differently from others | I find it hard to come up with new ideas from scratch       | 93 |
| charismatic | כריזמה    | People listen to me without me having to try                 | People tend to place me in a leadership position      | I tend to keep my opinions to myself                        | 92 |
| moral       | מוסריות   | Ethical rules guide my behavior                              | I tend to notice injustices around me                 | I find it hard to distinguish between good and bad behavior | 97 |
| generous    | נדיבות    | I tend to help those who ask for help                        | I try to do more good deeds                           | I'd rather invest my money than donate it                   | 90 |
| loyal       | נאמנות    | I'll do anything to help my friends                          | I want to keep the same friends for life              | I'll cut ties with friends who moved abroad                 | 97 |
| polite      | נימוס     | I make sure to address my elders with respect                | It's important for me to conduct myself pleasantly    | Sometimes people comment on my behavior                     | 94 |
| patient     | סבלנות    | It's easy for me to wait patiently for a long period of time | I tend not to get bored easily                        | It's hard for me when things drag on longer than expected   | 91 |
| forgiving   | סלחנות    | It's easy for me to move on after a fight and forget it      | I try to understand those who oppose me               | I tend to hold a grudge for a long time                     | 98 |
| spontaneous | ספונטניות | I frequently change my daily routine                         | I'll quickly shift to a new and interesting idea      | I find it difficult to cope with changes in plans           | 99 |
| gentle      | עדינות    | I show sensitivity to those around me                        | My courteousness characterizes how I behave           | I usually speak relatively loudly without noticing          | 99 |

|            |            |                                                         |                                                                      |                                                               |    |
|------------|------------|---------------------------------------------------------|----------------------------------------------------------------------|---------------------------------------------------------------|----|
| joyful     | עליזות     | I usually see the glass as half full                    | Most of the time, my mood is upbeat                                  | I see the world as a gloomy place                             | 90 |
| consistent | עקביות     | I tend to repeat similar patterns of behavior           | I try to maintain a fixed daily routine                              | I frequently change my opinions and stances                   | 96 |
| open       | פתיחות     | I tend to share what's on my heart with others          | It's easy for me to accept ideas I hadn't thought of                 | New situations stress me out                                  | 95 |
| humble     | צניעות     | It's hard for me to take credit for work I've done      | I prefer not to receive compliments even after success               | I often talk about my successes                               | 96 |
| calm       | רוגע       | It's easy for me to cope with a stressful situation     | I tend to keep my cool in any situation                              | I struggle to work under time pressure                        | 92 |
| spiritual  | רוחניות    | I have faith in a higher power                          | I believe I am part of something greater                             | I find it hard to believe in things I cannot see              | 93 |
| romantic   | רומנטיות   | I will always prefer to go out for intimate meals       | When I'm in a relationship, I try to excite and surprise             | I will choose a relationship based on rational considerations | 97 |
| rational   | רציונאליות | I find it difficult to carry out an illogical task      | It's important for me to list pros and cons before making a decision | Emotion rules my actions                                      | 95 |
| serious    | רצינות     | It's important for me to keep the commitments I've made | I find it hard to say things without prior thought                   | I often make fun of myself                                    | 91 |

*Note:*

Roughly translated from Hebrew by ChatGPT. Original length refers to N symbols in Hebrew.

### 3 Additional Analyses Unreported in the Paper

#### 3.1 Self-Esteem Mediation

Self-esteem was coded into 3 groups as recommended in the literature (Echeburua, 1995; García et al., 2019; Rosenberg, 1965)

Adding self-esteem to the main model did not impact the significance of the effect of Feedback or Valence on the desire to retake questionnaires. Yet neither the self-esteem nor its interaction with feedback, with valence or their three-way interaction, had a significant or consistent effect (across studies) effect on the desire to retake questionnaires.

Table 3: RSE Group Counts

| Group              | Count |
|--------------------|-------|
| Low RSE (<26)      | 10    |
| Medium RSE (26–29) | 17    |
| High RSE (>29)     | 31    |

Table 4: Descriptive Statistics

| variable  | n  | min | max | median | q1 | q3 | iqr | mad  | mean   | sd    | se    | ci    |
|-----------|----|-----|-----|--------|----|----|-----|------|--------|-------|-------|-------|
| rse.score | 58 | 19  | 39  | 30     | 27 | 34 | 7   | 5.93 | 30.259 | 4.997 | 0.656 | 1.314 |

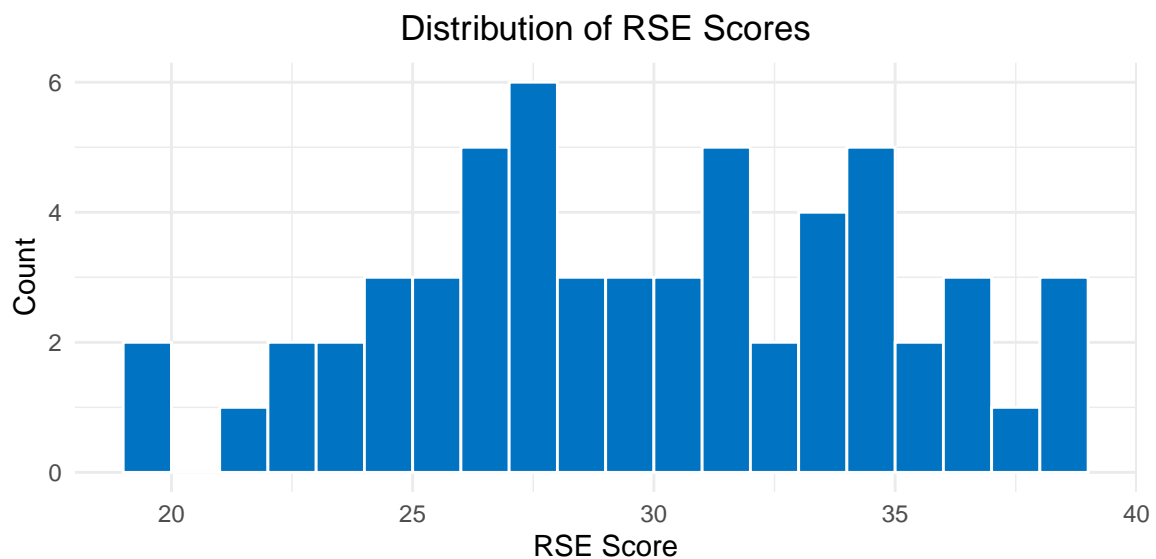



Table 5: Fixed Effects from RSE Model

| term                                    | $\beta$ | SE    | t value | df     | p.value | conf.low | conf.high |
|-----------------------------------------|---------|-------|---------|--------|---------|----------|-----------|
| Intercept                               | 1.788   | 2.548 | 0.702   | 55.610 | 0.486   | -3.317   | 6.893     |
| Feedback                                | 14.155  | 3.078 | 4.598   | 56.081 | 0.000   | 7.989    | 20.322    |
| Valence                                 | 7.369   | 1.887 | 3.906   | 43.514 | 0.000   | 3.565    | 11.172    |
| RSE (Medium vs. Low)                    | 2.950   | 4.045 | 0.729   | 55.088 | 0.469   | -5.155   | 11.056    |
| RSE (High vs. Medium)                   | -0.341  | 3.501 | -0.097  | 55.187 | 0.923   | -7.356   | 6.675     |
| Feedback × Valence                      | 2.162   | 1.726 | 1.252   | 50.303 | 0.216   | -1.306   | 5.629     |
| Feedback × RSE (Med vs. Low)            | -5.833  | 4.865 | -1.199  | 54.775 | 0.236   | -15.583  | 3.917     |
| Feedback × RSE (High vs. Med)           | -0.229  | 4.208 | -0.054  | 54.743 | 0.957   | -8.664   | 8.205     |
| Valence × RSE (Med vs. Low)             | 1.229   | 3.008 | 0.408   | 54.463 | 0.685   | -4.801   | 7.258     |
| Valence × RSE (High vs. Med)            | -1.403  | 2.602 | -0.539  | 54.480 | 0.592   | -6.619   | 3.814     |
| Feedback × Valence × RSE (Med vs. Low)  | 4.834   | 2.688 | 1.798   | 54.539 | 0.078   | -0.554   | 10.223    |
| Feedback × Valence × RSE (High vs. Med) | -4.392  | 2.327 | -1.888  | 54.694 | 0.064   | -9.056   | 0.271     |

Table 6: Estimated Marginal Means from Self-Esteem Model

| feedback     | valence            | RSE    | emmean  | SE     | df     | lower.CL | upper.CL |
|--------------|--------------------|--------|---------|--------|--------|----------|----------|
| Violation    | Non-Positive Trait | Low    | 28.654  | 9.733  | 55.786 | 9.154    | 48.153   |
| Verification | Non-Positive Trait | Low    | -1.983  | 10.051 | 55.140 | -22.124  | 18.159   |
| Violation    | Positive Trait     | Low    | -2.533  | 9.459  | 54.884 | -21.490  | 16.423   |
| Verification | Positive Trait     | Low    | -5.185  | 11.625 | 54.885 | -28.484  | 18.114   |
| Violation    | Non-Positive Trait | Medium | 19.108  | 7.495  | 55.751 | 4.092    | 34.125   |
| Verification | Non-Positive Trait | Medium | -4.282  | 7.776  | 54.204 | -19.871  | 11.306   |
| Violation    | Positive Trait     | Medium | 11.638  | 7.296  | 54.055 | -2.989   | 26.265   |
| Verification | Positive Trait     | Medium | -20.675 | 8.951  | 54.358 | -38.617  | -2.733   |
| Violation    | Non-Positive Trait | High   | 28.658  | 5.600  | 54.070 | 17.431   | 39.885   |
| Verification | Non-Positive Trait | High   | -15.216 | 5.752  | 52.793 | -26.754  | -3.679   |
| Violation    | Positive Trait     | High   | 10.134  | 5.459  | 51.098 | -0.824   | 21.092   |
| Verification | Positive Trait     | High   | -26.863 | 6.625  | 53.450 | -40.148  | -13.578  |

Table 7: Estimated Marginal Means at the different Self-Esteem levels

| RSE    | emmean | SE    | df     | lower.CL | upper.CL |
|--------|--------|-------|--------|----------|----------|
| Low    | 4.738  | 5.516 | 55.167 | -6.315   | 15.791   |
| Medium | 1.447  | 4.251 | 55.073 | -7.072   | 9.966    |
| High   | -0.822 | 3.155 | 53.771 | -7.149   | 5.505    |

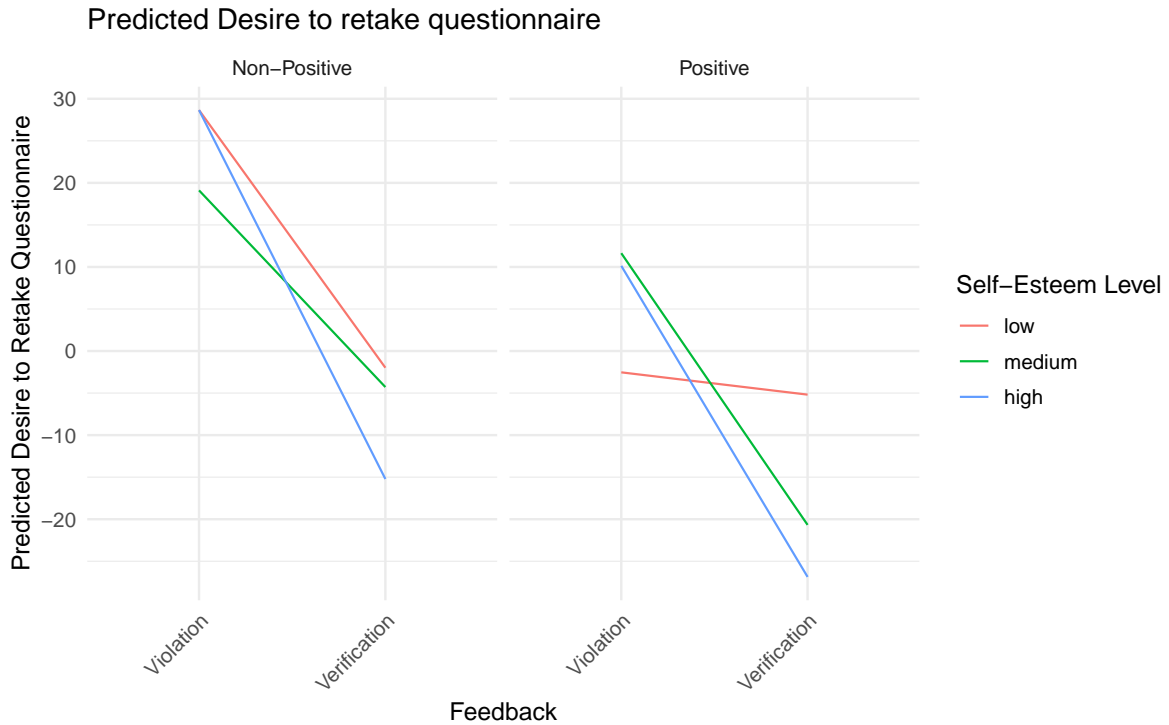

Figure 1: Interaction between Feedback, Valence, and RSE on desire to retake questionnaire  
The plot displays predicted data according to modelbased::estimate\_relation, and not original data.

### 3.2 Patient Health Questionnaire - 2

PHQ-2 was used as an estimate for depression tendency, yet we did not find enough variance in our sample to analyze relevant results

Table 8: RSE Group Counts

| Group                | Count |
|----------------------|-------|
| Low PHQ ( $\leq 3$ ) | 54    |
| High PHQ ( $> 3$ )   | 4     |

Table 9: Descriptive Statistics

| variable  | n  | min | max | median | q1 | q3 | iqr | mad   | mean  | sd   | se    | ci    |
|-----------|----|-----|-----|--------|----|----|-----|-------|-------|------|-------|-------|
| phq.score | 58 | 0   | 6   | 2      | 1  | 2  | 1   | 1.483 | 1.776 | 1.17 | 0.154 | 0.308 |

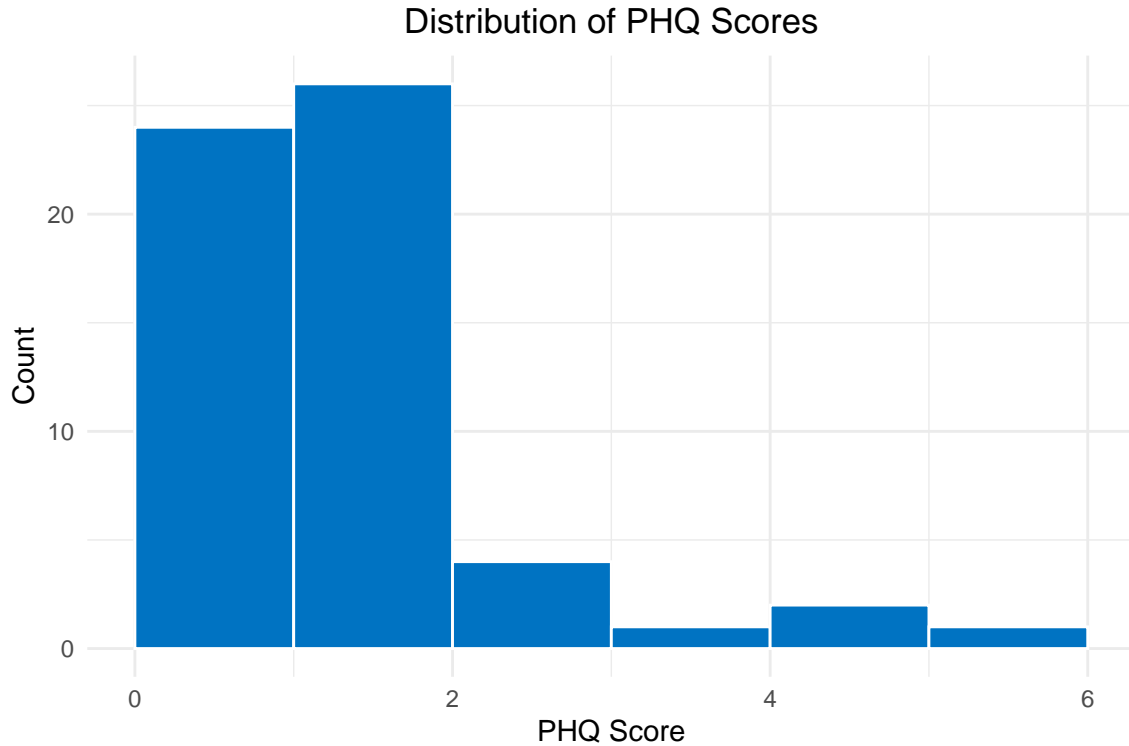

### 3.3 Trait Centrality Model

For each trait, participants rated how central that trait is to them. Centrality was significantly correlated with trait self-rating

Pearson correlation:  $r(926) = 0.54$ ,  $t = 19.33$ ,  $p < .001$ .

To help the interpretation of the centrality model, we person-mean centered centrality

Adding trait centrality (centered) to the main model did not impact the significance of the effect of Feedback or Valence on the desire to retake questionnaires. Yet neither the trait centrality or its interaction with feedback, with valence or their three-way interaction, had a significant or consistent (across studies) effect on the desire to retake questionnaires.

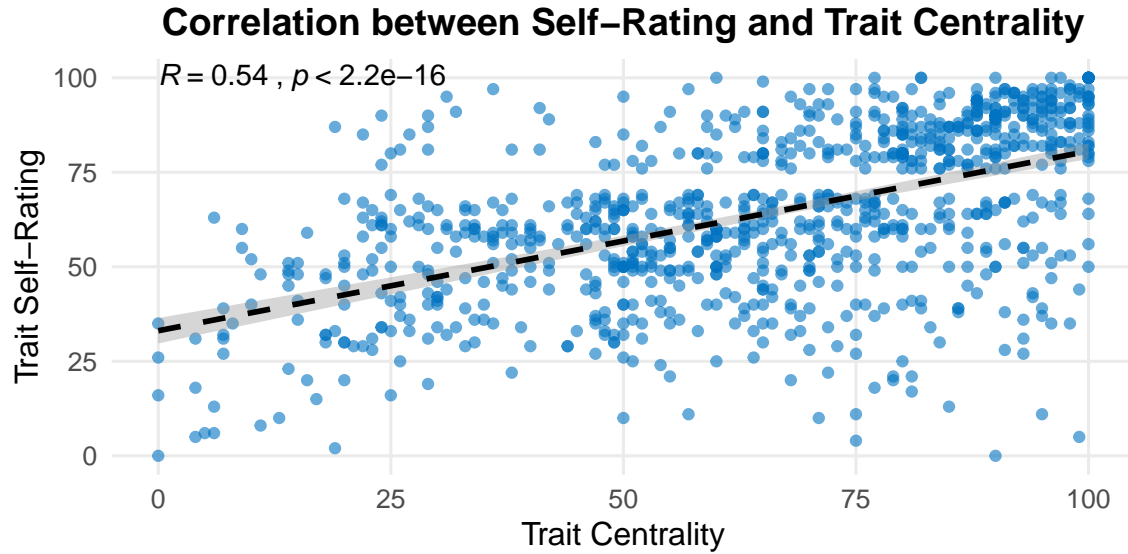

Figure 2: Correlation between self-rating and trait centrality

Table 10: Fixed Effects from Centrality Model

| term                            | $\beta$ | SE    | t value | df      | p.value | conf.low | conf.high |
|---------------------------------|---------|-------|---------|---------|---------|----------|-----------|
| Intercept                       | 1.275   | 2.208 | 0.577   | 55.856  | 0.566   | -3.148   | 5.698     |
| Feedback                        | 16.292  | 2.948 | 5.527   | 51.152  | 0.000   | 10.375   | 22.209    |
| Valence                         | 7.861   | 1.726 | 4.555   | 71.040  | 0.000   | 4.420    | 11.301    |
| Centrality                      | -0.005  | 0.064 | -0.075  | 133.807 | 0.940   | -0.132   | 0.123     |
| Feedback × Valence              | 0.856   | 1.868 | 0.458   | 58.020  | 0.649   | -2.883   | 4.595     |
| Feedback × Centrality           | -0.050  | 0.063 | -0.784  | 86.477  | 0.435   | -0.175   | 0.076     |
| Valence × Centrality            | -0.029  | 0.072 | -0.401  | 38.240  | 0.691   | -0.175   | 0.117     |
| Feedback × Valence × Centrality | -0.034  | 0.072 | -0.468  | 72.874  | 0.641   | -0.178   | 0.110     |

Table 11: Estimated Slopes of Centrality Across Feedback and Valence Conditions

| feedback     | valence            | Slope of Centrality | SE    | df     | lower.CL | upper.CL |
|--------------|--------------------|---------------------|-------|--------|----------|----------|
| Violation    | Non-Positive Trait | -0.117              | 0.128 | 42.225 | -0.375   | 0.141    |
| Verification | Non-Positive Trait | 0.050               | 0.163 | 41.215 | -0.279   | 0.379    |
| Violation    | Positive Trait     | 0.008               | 0.135 | 38.053 | -0.264   | 0.281    |
| Verification | Positive Trait     | 0.040               | 0.192 | 28.289 | -0.354   | 0.433    |

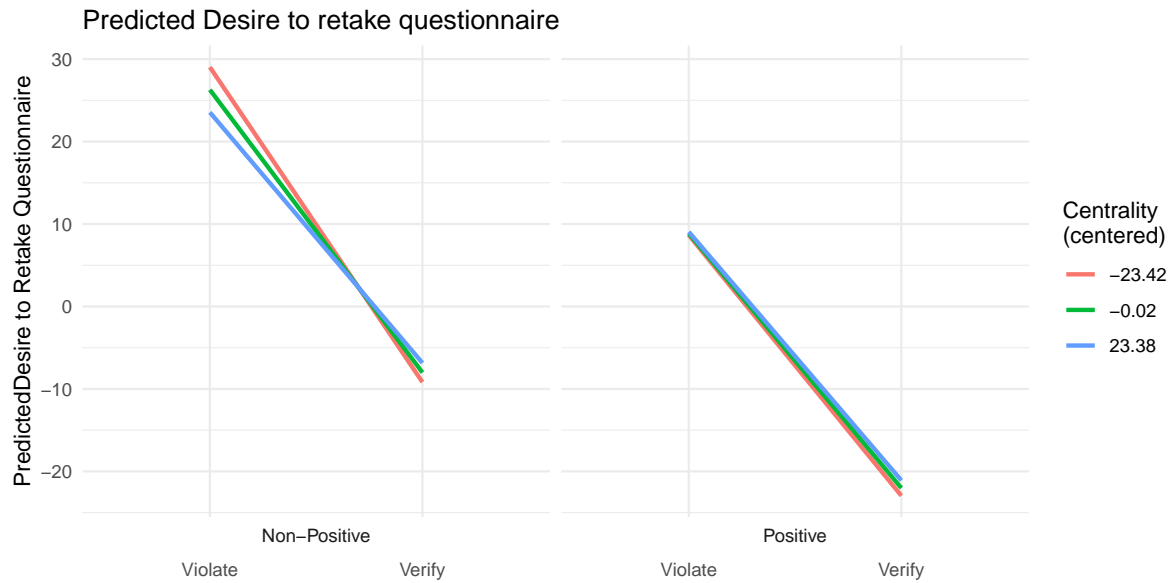

Figure 3: Interaction between Feedback, Valence, and Trait Centrality on desire to retake questionnaire. The plot displays predicted data according to `ggeffects::ggpredict`, not original data.
